# Supplementary material for: Cytosolic calcium regulates cytoplasmic accumulation of TDP-43 through Calpain-A and Importin α3
Source: eLife. 2020 Dec 11;9:e60132. doi: 10.7554/eLife.60132 (PMC7748415; doi:10.7554/eLife.60132)
Supplement: Figure 1—source data 1. [file elife-60132-fig1-data1.xlsx]

## Sheet: Fig1+Supple
Fig 1B	Image#	Nucleus	Cytoplasm	N/C	C/N		Fig 1D	Image#	Nucleus	Cytoplasm	N/C	C/N		Fig1-S1B	Image#	Nucleus	Cytoplasm	N/C	C/N
Sensory neurons	1	50.74	72	0.704722	1.419		120h AEL	1	61.04	100.19	0.609242	1.64138		120h AEL	1	100.15	63.73	1.57147	0.636345
	2	48.57	116.27	0.417735	2.39386			2	48.96	102.77	0.476404	2.09906			2	87.32	43.85	1.99133	0.502176
	3	49.22	116.28	0.423289	2.36245			3	38.56	82.78	0.465813	2.14678			3	103.55	55.27	1.87353	0.533752
	4	58.9	156.29	0.376864	2.65348			4	53.46	113.48	0.471096	2.12271			4	123.77	90.95	1.36086	0.734831
	5	46.68	90.26	0.517173	1.93359			5	44.81	92.66	0.483596	2.06784			5	122.89	96	1.2801	0.781186
	6	44.68	133.25	0.33531	2.98232			6	40.79	83.43	0.488913	2.04535			6	116.33	90.13	1.29069	0.774779
	7	70.84	120.71	0.586861	1.70398		0h APF	1	93.956	74.295	1.26463	0.790742			7	105.46	103.38	1.02012	0.980277
	8	86.66	170.98	0.506843	1.973			2	96.384	70.855	1.3603	0.735132			8	92.71	63.23	1.46623	0.682019
	9	56.02	94.27	0.594251	1.68279			3	83.801	112.607	0.74419	1.34374			9	102.49	82.36	1.24441	0.803591
	10	94.11	129.44	0.727055	1.37541			4	85.983	83.472	1.03008	0.970797		18h APF	1	122.51	29.38	4.16984	0.239817
	11	55.42	106.03	0.522682	1.91321			5	116.012	66.114	1.75473	0.569889			2	114.66	56.19	2.04058	0.490058
	12	89.29	159.28	0.560585	1.78385			6	84.323	69.221	1.21817	0.820903			3	96.12	17.31	5.55286	0.180087
Motor neurons	1	145.75	77.65	1.87701	0.532762			7	146.815	90.508	1.62212	0.616477
	2	153.2	55.7	2.75045	0.363577			8	95.44	48.197	1.98021	0.504998
	3	155.61	54.47	2.8568	0.350042			9	93.855	49.367	1.90117	0.525992
	4	92.01	43.05	2.13728	0.467884			10	111.47	96.031	1.16077	0.861496
	5	114.98	58.83	1.95445	0.511654		18h APF	1	84.59	30.39	2.78348	0.359262
	6	188.18	89.97	2.09159	0.478106			2	89.62	24.94	3.59342	0.278286
	7	116.98	44.66	2.61935	0.381775			3	62.26	24.55	2.53605	0.394314
	8	90.67	43.48	2.08533	0.479541			4	94.11	22.29	4.22207	0.23685
	9	171.16	60.77	2.81652	0.355048			5	53.69	18.32	2.93068	0.341218
	10	188.16	120.64	1.55968	0.641156			6	71.9	21.45	3.35198	0.298331
	11	166.85	66.8	2.49775	0.40036		10d adult	1	171.13	91.93	1.86153	0.537194
	12	72.27	30.71	2.35331	0.424934			2	171.04	116.25	1.47131	0.679666
	13	90.53	82.91	1.09191	0.915829			3	226.42	73.2	3.09317	0.323293
	14	87.33	34.2	2.55351	0.391618			4	145.78	119.38	1.22114	0.818905
	15	98.28	42.32	2.32231	0.430606			5	153.62	57.9	2.6532	0.376904
	16	98.18	37.31	2.63147	0.380016			6	238.2	171.78	1.38666	0.721159
	17	105.65	34.06	3.10188	0.322385			7	154.85	55.71	2.77957	0.359768
	18	142.49	35.59	4.00365	0.249772			8	61.66	48.35	1.27528	0.784139
	19	192.49	57.14	3.36874	0.296847			9	79.84	55.35	1.44246	0.693262
	20	98.82	31.59	3.12821	0.319672			10	74.04	53.79	1.37646	0.726499
	21	179.96	48.63	3.7006	0.270227			11	75.07	61.47	1.22125	0.818836
	22	157.19	32.02	4.90912	0.203703			12	177.62	19.65	9.03919	0.110629
	23	85.55	21.8	3.92431	0.254822			13	226.56	48.09	4.71117	0.212262
	24	209.86	86.85	2.41635	0.413847		40d adult	1	151.41	47	3.22149	0.310415
DA neurons	1	81.71	34.5	2.36841	0.422225			2	134.11	33	4.06394	0.246067
	2	97.04	47.33	2.05029	0.487737			3	176.94	53.46	3.30976	0.302136
	3	125.79	68.67	1.8318	0.54591			4	137.52	32.66	4.21066	0.237493
	4	57.95	37.4	1.54947	0.645384			5	132.18	27.94	4.73085	0.211378
	5	112.14	49.12	2.28298	0.438024			6	133.7	37.49	3.56628	0.280404
	6	79.81	51.41	1.55242	0.644155			7	157.95	45.4	3.47907	0.287433
	7	66.59	39.95	1.66683	0.59994			8	137.39	33.03	4.15955	0.240411
Glial cells	1	100.96	56.05	1.80125	0.55517
	2	109.77	51.34	2.1381	0.467705
	3	94.59	41.49	2.27983	0.43863
	4	89.82	43.44	2.06768	0.483634
	5	126.41	53.09	2.38105	0.419983
	6	108.36	57.14	1.89639	0.527316
	7	103.89	59.47	1.74693	0.572432
	8	98.86	41.63	2.37473	0.421101
	9	94.86	56.32	1.6843	0.593717
	10	111.26	64.34	1.72925	0.578285
	11	80.98	41.64	1.94476	0.514201
	12	88.21	35.54	2.48199	0.402902
	13	95.07	50.67	1.87626	0.532976
	14	137.75	70.87	1.9437	0.514483
	15	128.22	63.39	2.02272	0.494385
	16	71.3	50.21	1.42004	0.704208
	17	60.77	33.67	1.80487	0.554056
	18	95	47.24	2.01101	0.497263
	19	91.54	54.79	1.67074	0.598536
	20	113.9	47.74	2.38584	0.41914
	21	83.08	42.09	1.97387	0.50662
	22	104.88	52.52	1.99695	0.500763
	23	84.94	60.95	1.3936	0.717565
	24	166.14	80.09	2.07442	0.482063
	25	79.08	40	1.977	0.505817
	26	163.92	87.23	1.87917	0.53215
	27	231.87	113.65	2.04021	0.490145
	28	110	74.56	1.47532	0.677818
