# Supplementary material for: Cytosolic calcium regulates cytoplasmic accumulation of TDP-43 through Calpain-A and Importin α3
Source: eLife. 2020 Dec 11;9:e60132. doi: 10.7554/eLife.60132 (PMC7748415; doi:10.7554/eLife.60132)
Supplement: Figure 2—source data 1. [file elife-60132-fig2-data1.xlsx]

## Sheet: Fig2+Supple
Fig 2B													Fig 2B	Image#	Mean (GCamp/tdTOM)					Fig2-S1B	Image#	Nucleus	Cytoplasm	N/C	C/N		Fig2-S1I	Time (sec)	n=1	n=2	n=3		Fig2-S1J	Image#	Nucleus	Cytoplasm	N/C	C/N		Fig2-S2B	Image#	Nucleus	Cytoplasm	N/C	C/N
120h AEL-1		120h AEL-2		120h AEL-3		18h APF-1		18h APF-2		18h APF-3			120h AEL	1	0.304					Ctrl	1	82.565	23.573	3.50252	0.285508			1	203.455	185.796	162.945		Ctrl	1	84.28	57.97	1.45386	0.687826		hTDP-43 WT (Ctrl,120h AEL)	1	55.449	70.82	0.782957	1.27721
bean start	count	bean start	count	bean start	count	bean start	count	bean start	count	bean start	count			2	0.318						2	78.853	41.512	1.89952	0.526448			2	202.607	183.042	160.399			2	50.02	42.74	1.17033	0.854458			2	24.34	60.418	0.40286	2.48225
0.232	3	0.23	2	0.2	2	0.251	1	0.335	5	0.286	3			3	0.3						3	70.662	39.321	1.79706	0.556466			3	202.083	181.397	159.474			3	72.27	61.46	1.17589	0.850422			3	35.029	60.285	0.581057	1.721
0.232	5	0.232	2	0.201	0	0.252	2	0.336	1	0.287	0		18h APF	1	0.334						4	46.864	33.398	1.4032	0.712658			4	201.344	179.965	158.3			4	97.45	55.26	1.76348	0.56706			4	33.235	75.36	0.441016	2.26749
0.233	3	0.233	2	0.202	1	0.253	2	0.338	1	0.288	3			2	0.456						5	60.022	29.101	2.06254	0.484839			5	199.91	177.555	157.802			5	83.26	64.89	1.28309	0.779366			5	31.487	59.851	0.52609	1.90082
0.234	5	0.234	3	0.203	3	0.254	2	0.339	3	0.29	0			3	0.418						6	77.271	32.679	2.36455	0.422914			6	200.709	177.516	159.273			6	67.33	54.11	1.24432	0.803654			6	51.284	75.844	0.676177	1.4789
0.235	3	0.236	1	0.204	0	0.255	2	0.34	3	0.291	1									Itpr Ri	1	87.816	78.127	1.12402	0.889667			7	200.674	175.793	158.086			7	87.06	39.8	2.18744	0.457156			7	24.969	45.266	0.551606	1.81289
0.236	1	0.237	1	0.205	0	0.256	0	0.342	5	0.293	0		Fig 2D	Image#	Nucleus	Cytoplasm	N/C	C/N			2	131.784	133.048	0.9905	1.00959			8	201.714	176.579	158.098			8	170.55	71.92	2.37138	0.421695			8	37.742	53.895	0.700288	1.42798
0.237	3	0.239	2	0.206	0	0.257	2	0.343	1	0.294	1		Ctrl	1	122.8	53.7	2.28678	0.437296			3	156.263	152.731	1.02313	0.977397			9	201.26	174.894	157.165			9	114.59	72.19	1.58734	0.629985			9	34.883	58.151	0.599869	1.66703
0.238	3	0.24	1	0.207	0	0.257	0	0.344	0	0.295	1			2	163.17	94.56	1.72557	0.579518			4	66.6	74.612	0.892618	1.1203			10	202.188	175.225	156.556			10	41.71	20.88	1.99761	0.500599		hTDP-43 WT (Ctrl,18h APF)	1	110.554	38.99	2.83544	0.352678
0.239	6	0.241	3	0.209	2	0.258	0	0.346	1	0.297	0			3	162.4	74.37	2.18368	0.457943			5	92.202	47.144	1.95575	0.511312			11	201.702	175.273	157.95			11	114.28	38.7	2.95297	0.338642			2	140.101	38.242	3.66354	0.27296
0.24	2	0.243	1	0.21	0	0.259	0	0.347	1	0.298	1			4	191.86	77.44	2.47753	0.403628			6	94.892	67.52	1.40539	0.711546			12	203.33	174.492	156.415			12	64.5	40.71	1.58438	0.631163			3	193.006	70.907	2.72196	0.367382
0.241	6	0.244	0	0.211	0	0.26	0	0.348	3	0.3	0			5	185.7	101.33	1.83263	0.545665			7	110.738	106.574	1.03907	0.962398			13	202.698	174.733	159.174			13	65.43	43.77	1.49486	0.668959			4	107.22	34.76	3.08458	0.324193
0.242	2	0.246	1	0.212	2	0.261	1	0.35	5	0.301	1			6	166.32	105.03	1.58355	0.631494			8	205.348	125.137	1.64099	0.60939			14	203.153	173.533	157.005			14	87.47	34.9	2.5063	0.398994			5	114.016	57.783	1.97318	0.506797
0.242	3	0.247	2	0.213	1	0.262	2	0.351	0	0.302	2			7	183.88	43.96	4.18289	0.239069			9	117.186	111.9	1.04724	0.954892			15	202.493	173.749	157.585			15	96.6	44.77	2.15769	0.463458			6	127.222	57.239	2.22265	0.449914
0.243	4	0.248	3	0.214	1	0.263	1	0.352	5	0.304	0			8	100.61	34.9	2.88281	0.346884			10	118.499	122.589	0.966636	1.03452			16	229.411	198.934	212.494			16	107.72	62.65	1.71939	0.5816			7	103.847	44.266	2.34598	0.426262
0.244	3	0.25	5	0.215	1	0.263	1	0.354	1	0.305	0			9	192.01	99.15	1.93656	0.516379		Itpr sv35/+	1	85.232	97.421	0.874883	1.14301			17	226.391	206.12	203.078			17	98.94	81.43	1.21503	0.823024			8	169.344	74.087	2.28575	0.437494
0.245	2	0.251	3	0.216	0	0.264	0	0.355	7	0.306	0		Itpr ka1091/+	1	89.59	70.24	1.27548	0.784016			2	63.104	69.839	0.903564	1.10673			18	229.357	208.679	191.209			18	126.3	99.24	1.27267	0.785748			9	202.536	61.543	3.29097	0.303862
0.246	5	0.253	2	0.217	0	0.265	2	0.356	2	0.308	1			2	158.2	127.89	1.237	0.808407			3	64.288	71.284	0.901857	1.10882			19	231.896	210.498	191.523			19	89.95	53.71	1.67473	0.59711			10	153.781	62.825	2.44777	0.408536
0.247	1	0.254	5	0.219	1	0.266	5	0.358	3	0.309	2			3	167.88	111.94	1.49973	0.666786			4	81.325	61.221	1.32838	0.752794			20	230.979	209.853	197.302			20	87.71	38.99	2.24955	0.444533		hTDP-43 WT (RyR Ri,18h APF)	1	110.73	77.13	1.43563	0.696559
0.248	3	0.255	4	0.22	0	0.267	1	0.359	4	0.311	1			4	149.95	99.37	1.50901	0.662688			5	57.573	74.019	0.777814	1.28565			21	231.537	208.429	202.301			21	56.42	34.61	1.63016	0.613435			2	102.097	70.729	1.4435	0.692763
0.249	6	0.257	3	0.221	3	0.268	0	0.36	7	0.312	0			5	67.85	30.22	2.2452	0.445394			6	54.393	80.475	0.675899	1.47951			22	231.139	208.048	205.101		Illuminated	1	156.05	80.17	1.94649	0.513746			3	112.042	42.958	2.60818	0.38341
0.25	4	0.258	3	0.222	1	0.269	0	0.362	6	0.313	0			6	128.8	85.03	1.51476	0.660171			7	93.642	99.367	0.942385	1.06114			23	230.784	208.282	207.023			2	190.04	80.01	2.3752	0.421017			4	101.768	63.66	1.59862	0.62554
0.251	2	0.26	3	0.223	1	0.27	0	0.363	3	0.315	0			7	146.38	87.95	1.66435	0.600833			8	138.509	155.741	0.889355	1.12441			24	230.112	209.953	210.705			3	105.72	57.6	1.83542	0.544835			5	69.331	54.72	1.26701	0.789257
0.252	1	0.261	6	0.224	2	0.27	0	0.364	4	0.316	1			8	114.56	65.62	1.74581	0.5728			9	70.242	105.627	0.665	1.50376			25	231.096	212.321	213.018			4	142.33	76.83	1.85253	0.539802			6	69.452	72.797	0.95405	1.04816
0.252	6	0.262	2	0.225	0	0.271	1	0.366	3	0.317	1																	26	231.557	210.17	210.735			5	94.42	52.73	1.79063	0.558462			7	68.385	64.027	1.06807	0.936273
0.253	3	0.264	4	0.226	2	0.272	0	0.367	3	0.319	4		Fig 2F	Image#	Nucleus	Cytoplasm	N/C	C/N		Fig2-S1D	Image#	Nucleus	Cytoplasm	N/C	C/N			27	230.295	209.378	210.447			6	148.07	68.23	2.17016	0.460796			8	67.103	59.052	1.13634	0.88002
0.254	8	0.265	9	0.227	1	0.273	1	0.368	5	0.32	3		Ctrl	1	61.04	100.19	0.609242	1.64138		Ctrl	1	120.83	79.46	1.52064	0.657618			28	230.079	208.391	208.74			7	170.74	44.94	3.79929	0.263207			9	71.297	54.941	1.2977	0.770593
0.255	3	0.267	4	0.229	1	0.274	0	0.37	2	0.322	4			2	48.96	102.77	0.476404	2.09906			2	141.06	88.03	1.60241	0.624061			29	230.068	206.933	208.372			8	67.23	16.85	3.98991	0.250632			10	70.148	60.75	1.1547	0.866026
0.256	6	0.268	2	0.23	1	0.275	0	0.371	1	0.323	3			3	38.56	82.78	0.465813	2.14678			3	85.88	22.64	3.79329	0.263624			30	228.683	208.103	207.401			9	220.04	57.28	3.84148	0.260316			11	114.36	76.181	1.50116	0.666151
0.257	5	0.269	5	0.231	1	0.276	4	0.372	4	0.324	0			4	53.46	113.48	0.471096	2.12271			4	135.36	38.48	3.51767	0.284279									10	67.36	20.21	3.333	0.30003			12	68.631	54.195	1.26637	0.789658
0.258	6	0.271	10	0.232	1	0.277	2	0.374	2	0.326	3			5	44.81	92.66	0.483596	2.06784			5	120.46	53.34	2.25834	0.442803									11	157.62	23.45	6.72154	0.148776			13	95.166	51.45	1.84968	0.540634
0.259	4	0.272	5	0.233	4	0.277	0	0.375	1	0.327	1			6	40.79	83.43	0.488913	2.04535		RyR16/+	1	96.44	103.36	0.93305	1.07175									12	204.88	41.04	4.9922	0.200312		hTDP-43 G287S (Ctrl,120h AEL)	1	59.725	75.568	0.790348	1.26527
0.26	6	0.274	4	0.234	3	0.278	2	0.376	4	0.328	3		SERCA Ri	1	85.24	70.08	1.21632	0.822149			2	84.17	79.99	1.05226	0.950339									13	102.03	22.41	4.55288	0.219641			2	66.805	93.021	0.718171	1.39243
0.261	2	0.275	5	0.235	2	0.279	3	0.378	1	0.33	6			2	99.02	76.42	1.29573	0.771763			3	67.78	93.59	0.724223	1.38079									14	59.03	15.95	3.70094	0.270202			3	75.946	88.724	0.85598	1.16825
0.262	3	0.276	4	0.236	1	0.28	0	0.379	2	0.331	2			3	126.83	69.78	1.81757	0.550185																15	85.35	39.21	2.17674	0.459402			4	41.552	83.662	0.496665	2.01343
0.262	8	0.278	9	0.238	3	0.281	2	0.38	6	0.333	1			4	61.45	61.68	0.996271	1.00374		Fig2-S1G	Image#	Nucleus	Cytoplasm	N/C	C/N									16	51.48	14.31	3.59748	0.277972			5	38.725	67.906	0.570274	1.75354
0.263	3	0.279	5	0.239	2	0.282	2	0.382	3	0.334	1			5	45.08	57.41	0.785229	1.27351		Ctrl	1	50.74	72	0.704722	1.419									17	86.35	22.28	3.87567	0.25802			6	43.729	70.855	0.617162	1.62032
0.264	7	0.281	6	0.24	3	0.283	1	0.383	3	0.335	3			6	41.4	52.29	0.791738	1.26304			2	48.57	116.27	0.417735	2.39386									18	72.36	27.49	2.63223	0.379906			7	51.273	57.627	0.889739	1.12392
0.265	3	0.282	9	0.241	1	0.283	2	0.384	1	0.337	1			7	84.41	71.3	1.18387	0.844687			3	49.22	116.28	0.423289	2.36245																8	37.997	43.447	0.87456	1.14343
0.266	5	0.283	4	0.242	4	0.284	2	0.386	5	0.338	2			8	132.28	65.9	2.00728	0.498186			4	58.9	156.29	0.376864	2.65348																9	32.277	45.793	0.704846	1.41875
0.267	8	0.285	10	0.243	0	0.285	1	0.387	2	0.339	0			9	155.72	43.98	3.5407	0.28243			5	46.68	90.26	0.517173	1.93359															hTDP-43 G287S (Ctrl,18h APF)	1	130.867	67.79	1.93048	0.518007
0.268	2	0.286	2	0.244	2	0.286	2	0.388	2	0.341	1			10	133.42	32.03	4.16547	0.240069			6	44.68	133.25	0.33531	2.98232																2	117.692	81.178	1.4498	0.68975
0.269	3	0.288	8	0.245	1	0.287	1	0.39	4	0.342	3			11	106.1	33.53	3.16433	0.316023			7	70.84	120.71	0.586861	1.70398																3	74	87.834	0.842498	1.18695
0.27	5	0.289	8	0.246	5	0.288	0	0.391	3	0.344	2			12	82.02	23.25	3.52774	0.283467			8	86.66	170.98	0.506843	1.973																4	245.37	145.579	1.68548	0.593304
0.271	6	0.291	20	0.248	2	0.289	1	0.392	3	0.345	4			13	147.96	73	2.02685	0.493377			9	56.02	94.27	0.594251	1.68279																5	239.881	163.072	1.47101	0.679804
0.272	3	0.292	9	0.249	3	0.29	2	0.394	6	0.346	2										10	94.11	129.44	0.727055	1.37541																6	113.561	89.382	1.27051	0.787084
0.272	4	0.293	8	0.25	4	0.29	4	0.395	3	0.348	2		Fig 2I	Image#	Nucleus	Cytoplasm	N/C	C/N			11	55.42	106.03	0.522682	1.91321																7	130.631	53.719	2.43175	0.411227
0.273	8	0.295	11	0.251	0	0.291	2	0.396	1	0.349	1		Ctrl	1	89.83	48.91	1.83664	0.544473			12	89.29	159.28	0.560585	1.78385																8	122.481	80.666	1.51837	0.6586
0.274	10	0.296	7	0.252	2	0.292	0	0.398	1	0.351	5			2	105.38	113.34	0.929769	1.07554		NachBac O/E	1	92.28	103.67	0.890132	1.12343																9	104.286	90.402	1.15358	0.866866
0.275	5	0.298	7	0.253	5	0.293	1	0.399	3	0.352	1			3	155.96	108.35	1.43941	0.694729			2	46.46	108.16	0.429549	2.32802																10	89.596	79.979	1.12024	0.892663
0.276	4	0.299	15	0.254	1	0.294	5	0.4	4	0.353	2			4	102.67	52.43	1.95823	0.510665			3	68.42	100.15	0.683175	1.46375																11	139.239	67.331	2.06798	0.483564
0.277	4	0.3	4	0.255	3	0.295	3	0.402	6	0.355	0			5	100.13	116.42	0.860076	1.16269			4	45.09	67.1	0.671982	1.48813																12	63.199	50.168	1.25975	0.79381
0.278	4	0.302	4	0.256	5	0.296	0	0.403	2	0.356	2			6	70.69	61.7	1.14571	0.872825			5	71.88	63.37	1.13429	0.881608																13	154.937	80.035	1.93587	0.516565
0.279	4	0.303	8	0.258	1	0.296	1	0.404	5	0.357	2			7	135.06	91.81	1.47108	0.679772			6	67.66	106.15	0.6374	1.56887																14	95.929	74.575	1.28634	0.777398
0.28	10	0.305	7	0.259	2	0.297	3	0.406	6	0.359	0			8	85.34	44.31	1.92598	0.519217			7	70.91	74.2	0.95566	1.0464															hTDP-43 G287S (RyR Ri,18h APF)	1	64.076	69.643	0.920064	1.08688
0.281	3	0.306	9	0.26	6	0.298	2	0.407	2	0.36	2			9	133.98	68.42	1.9582	0.510673																							2	71.913	70.053	1.02655	0.974135
0.282	5	0.307	10	0.261	5	0.299	3	0.408	0	0.362	2			10	156.79	84.56	1.85419	0.53932																							3	49.278	48.917	1.00738	0.992674
0.283	7	0.309	7	0.262	2	0.3	1	0.41	4	0.363	3			11	146.01	73.23	1.99385	0.501541																							4	86.85	85.862	1.01151	0.988624
0.283	6	0.31	8	0.263	7	0.301	2	0.411	3	0.364	3			12	148.72	81.24	1.83063	0.546261																							5	54.92	68.135	0.806047	1.24062
0.284	7	0.312	6	0.264	6	0.302	2	0.412	3	0.366	2		Illuminated	1	228.32	119.56	1.90967	0.523651																							6	86.336	69.999	1.23339	0.810774
0.285	13	0.313	9	0.265	4	0.303	3	0.414	5	0.367	2			2	237.69	98.64	2.40967	0.414994																							7	78.989	45.413	1.73935	0.574928
0.286	5	0.314	8	0.266	3	0.303	2	0.415	2	0.368	3			3	221.59	138.05	1.60514	0.622997																							8	61.943	40.78	1.51896	0.658347
0.287	10	0.316	7	0.268	5	0.304	0	0.416	2	0.37	2			4	244.9	133.39	1.83597	0.544671																							9	73.114	59.964	1.2193	0.820144
0.288	8	0.317	7	0.269	4	0.305	0	0.418	7	0.371	0			5	207.65	107.45	1.93253	0.517457
0.289	9	0.319	9	0.27	6	0.306	0	0.419	3	0.373	0			6	207.57	115.36	1.79932	0.555764
0.29	8	0.32	5	0.271	2	0.307	4	0.42	6	0.374	4			7	191.69	96.68	1.98273	0.504356
0.291	4	0.321	9	0.272	2	0.308	1	0.422	4	0.375	5			8	184.57	100.73	1.83232	0.545755
0.292	9	0.323	12	0.273	1	0.309	2	0.423	3	0.377	1			9	137.42	62.73	2.19066	0.456484
0.293	10	0.324	4	0.274	5	0.31	2	0.424	3	0.378	3			10	170.53	101.13	1.68625	0.593033
0.293	3	0.326	5	0.275	5	0.31	3	0.426	2	0.379	3			11	202.5	126.68	1.59852	0.62558
0.294	12	0.327	11	0.276	6	0.311	3	0.427	0	0.381	1			12	132.1	61.92	2.1334	0.468736
0.295	6	0.328	12	0.278	5	0.312	2	0.428	0	0.382	3
0.296	8	0.33	4	0.279	3	0.313	1	0.43	2	0.384	2
0.297	4	0.331	4	0.28	8	0.314	5	0.431	2	0.385	5
0.298	7	0.333	9	0.281	5	0.315	1	0.432	2	0.386	1
0.299	8	0.334	4	0.282	4	0.316	5	0.434	1	0.388	4
0.3	8	0.335	6	0.283	8	0.316	2	0.435	0	0.389	2
0.301	5	0.337	4	0.284	5	0.317	1	0.436	4	0.391	2
0.302	7	0.338	4	0.285	7	0.318	0	0.438	6	0.392	3
0.303	8	0.34	4	0.286	6	0.319	5	0.439	2	0.393	8
0.303	4	0.341	4	0.288	4	0.32	3	0.44	6	0.395	5
0.304	8	0.342	5	0.289	4	0.321	4	0.442	3	0.396	5
0.305	6	0.344	2	0.29	10	0.322	3	0.443	5	0.397	6
0.306	4	0.345	2	0.291	4	0.323	4	0.444	2	0.399	3
0.307	6	0.347	3	0.292	5	0.323	4	0.446	1	0.4	4
0.308	9	0.348	5	0.293	6	0.324	2	0.447	5	0.402	4
0.309	7	0.349	4	0.294	9	0.325	5	0.448	2	0.403	5
0.31	8	0.351	4	0.295	7	0.326	2	0.45	4	0.404	3
0.311	7	0.352	3	0.296	8	0.327	1	0.451	3	0.406	2
0.312	5	0.354	3	0.298	4	0.328	3	0.452	9	0.407	2
0.313	4	0.355	5	0.299	4	0.329	3	0.454	5	0.408	1
0.313	10	0.356	5	0.3	5	0.329	3	0.455	2	0.41	8
0.314	9	0.358	2	0.301	3	0.33	5	0.456	1	0.411	2
0.315	6	0.359	1	0.302	6	0.331	2	0.458	2	0.413	3
0.316	4	0.361	5	0.303	1	0.332	2	0.459	5	0.414	2
0.317	2	0.362	4	0.304	6	0.333	4	0.46	2	0.415	2
0.318	5	0.363	1	0.305	4	0.334	6	0.462	2	0.417	2
0.319	5	0.365	1	0.306	3	0.335	1	0.463	2	0.418	1
0.32	5	0.366	1	0.308	4	0.336	2	0.464	1	0.419	3
0.321	4	0.368	2	0.309	5	0.336	2	0.466	2	0.421	6
0.322	5	0.369	2	0.31	3	0.337	2	0.467	2	0.422	8
0.323	6	0.37	4	0.311	7	0.338	3	0.468	3	0.424	3
0.323	4	0.372	4	0.312	7	0.339	3	0.47	0	0.425	4
0.324	7	0.373	3	0.313	3	0.34	1	0.471	1	0.426	2
0.325	4	0.375	2	0.314	5	0.341	4	0.472	2	0.428	3
0.326	7	0.376	1	0.315	8	0.342	2	0.474	4	0.429	5
0.327	8	0.377	2	0.316	4	0.343	4	0.475	1	0.431	2
0.328	5	0.379	5	0.318	9	0.343	3	0.476	2	0.432	3
0.329	2	0.38	2	0.319	7	0.344	1	0.478	1	0.433	9
0.33	7	0.382	5	0.32	2	0.345	0	0.479	0	0.435	4
0.331	5	0.383	2	0.321	3	0.346	3	0.48	2	0.436	3
0.332	2	0.384	2	0.322	4	0.347	0	0.482	0	0.437	1
0.333	7	0.386	2	0.323	4	0.348	3	0.483	1	0.439	4
0.334	9	0.387	1	0.324	7	0.349	1	0.484	1	0.44	1
0.334	5	0.389	2	0.325	8	0.349	1	0.486	2	0.442	2
0.335	7	0.39	4	0.326	1	0.35	1	0.487	2	0.443	2
0.336	6	0.391	3	0.328	4	0.351	0	0.488	1	0.444	1
0.337	4	0.393	3	0.329	4	0.352	2	0.49	2	0.446	5
0.338	3	0.394	1	0.33	3	0.353	5	0.491	1	0.447	1
0.339	2	0.396	2	0.331	7	0.354	4	0.492	3	0.448	1
0.34	4	0.397	1	0.332	1	0.355	2	0.494	4	0.45	2
0.341	7	0.398	1	0.333	5	0.356	2	0.495	0	0.451	2
0.342	1	0.4	2	0.334	2	0.356	4	0.496	0	0.453	4
0.343	0	0.401	2	0.335	4	0.357	0	0.498	0	0.454	2
0.344	4	0.403	1	0.336	1	0.358	2	0.499	0	0.455	2
0.344	3	0.404	0	0.338	2	0.359	1	0.5	0	0.457	4
0.345	10	0.405	0	0.339	1	0.36	1	0.502	2	0.458	3
0.346	2	0.407	0	0.34	2	0.361	1	0.503	0	0.459	2
0.347	3	0.408	1	0.341	3	0.362	0	0.504	0	0.461	1
0.348	3	0.41	1	0.342	2	0.363	2	0.506	1	0.462	3
0.349	5	0.411	1	0.343	6	0.363	1	0.507	2	0.464	2
0.35	5	0.413	2	0.344	3	0.364	3	0.508	2	0.465	1
0.351	0	0.414	1	0.345	4	0.365	2	0.51	0	0.466	3
0.352	1	0.415	0	0.346	2	0.366	1	0.511	0	0.468	2
0.353	3	0.417	1	0.348	1	0.367	2	0.512	1	0.469	5
0.354	4	0.418	0	0.349	1	0.368	2	0.514	2	0.471	2
0.354	8	0.42	0	0.35	0	0.369	1	0.515	1	0.472	1
0.355	2	0.421	0	0.351	2	0.369	2	0.516	1	0.473	1
0.356	3	0.422	1	0.352	3	0.37	0	0.518	0	0.475	3
0.357	0	0.424	0	0.353	2	0.371	1	0.519	0	0.476	2
0.358	1	0.425	0	0.354	1	0.372	1	0.52	1	0.477	0
0.359	4	0.427	1	0.355	1	0.373	2	0.522	1	0.479	4
0.36	2	0.428	0	0.356	1	0.374	2	0.523	2	0.48	1
0.361	3	0.429	0	0.358	3	0.375	0	0.524	0	0.482	0
0.362	3	0.431	0	0.359	0	0.376	1	0.526	1	0.483	2
0.363	0	0.432	0	0.36	3	0.376	2	0.527	1	0.484	3
0.364	0	0.434	0	0.361	3	0.377	0	0.528	0	0.486	1
0.364	1	0.435	1	0.362	1	0.378	0	0.53	2	0.487	0
0.365	3	0.436	0	0.363	0	0.379	1	0.531	1	0.488	1
0.366	3	0.438	0	0.364	0	0.38	2	0.532	0	0.49	2
0.367	2	0.439	1	0.365	2	0.381	3	0.534	1	0.491	4
0.368	4	0.441	0	0.366	1	0.382	1	0.535	0	0.493	0
0.369	2	0.442	0	0.368	2	0.382	2	0.536	0	0.494	2
0.37	2	0.443	0	0.369	1	0.383	0	0.538	2	0.495	1
0.371	0	0.445	0	0.37	0	0.384	4	0.539	0	0.497	2
0.372	2	0.446	0	0.371	3	0.385	0	0.54	0	0.498	2
0.373	0	0.448	1	0.372	1	0.386	0	0.542	1	0.499	4
0.374	3	0.449	1	0.373	1	0.387	0	0.543	0	0.501	2
0.374	2	0.45	0	0.374	1	0.388	0	0.544	0	0.502	1
0.375	1	0.452	0	0.375	0	0.389	0	0.546	1	0.504	1
0.376	0	0.453	0	0.377	1	0.389	4	0.547	0	0.505	1
0.377	0	0.455	1	0.378	1	0.39	0	0.548	0	0.506	2
0.378	1	0.456	0	0.379	0	0.391	2	0.55	1	0.508	0
0.379	1	0.457	0	0.38	2	0.392	2	0.551	0	0.509	2
0.38	1	0.459	0	0.381	0	0.393	0	0.552	0	0.51	1
0.381	2	0.46	1	0.382	0	0.394	0	0.554	0	0.512	0
0.382	2	0.462	0	0.383	2	0.395	1	0.555	1	0.513	0
0.383	2	0.463	0	0.384	1	0.396	2	0.556	0	0.515	1
0.384	0	0.464	0	0.385	1	0.396	0	0.558	0	0.516	4
0.385	0	0.466	0	0.387	1	0.397	2	0.559	0	0.517	1
0.385	1	0.467	0	0.388	1	0.398	0	0.56	0	0.519	1
0.386	1	0.469	0	0.389	0	0.399	0	0.562	0	0.52	0
0.387	0	0.47	0	0.39	1	0.4	0	0.563	1	0.522	1
0.388	0	0.471	0	0.391	0	0.401	0	0.564	1	0.523	2
0.389	1	0.473	0	0.392	3	0.402	0	0.566	2	0.524	2
0.39	2	0.474	0	0.393	1	0.402	0	0.567	1	0.526	1
0.391	0	0.476	0	0.394	3	0.403	0	0.568	0	0.527	2
0.392	0	0.477	0	0.395	1	0.404	1	0.57	0	0.528	2
0.393	1	0.478	0	0.397	0	0.405	0	0.571	0	0.53	0
0.394	2	0.48	2	0.398	0	0.406	0	0.572	0	0.531	0
0.395	0	0.481	0	0.399	1	0.407	2	0.574	0	0.533	1
0.395	0	0.483	0	0.4	0	0.408	1	0.575	0	0.534	1
0.396	0	0.484	0	0.401	0	0.409	1	0.576	1	0.535	1
0.397	2	0.485	1	0.402	0	0.409	2	0.578	0	0.537	1
0.398	0	0.487	0	0.403	0	0.41	0	0.579	0	0.538	0
0.399	0	0.488	0	0.404	0	0.411	1	0.58	0	0.539	1
0.4	0	0.49	0	0.405	2	0.412	2	0.582	0	0.541	0
0.401	0	0.491	0	0.407	0	0.413	0	0.583	0	0.542	0
0.402	2	0.492	0	0.408	1	0.414	2	0.584	0	0.544	1
0.403	0	0.494	0	0.409	1	0.415	2	0.586	0	0.545	0
0.404	0	0.495	0	0.41	0	0.415	0	0.587	0	0.546	0
0.405	0	0.497	0	0.411	1	0.416	0	0.588	0	0.548	2
0.405	0	0.498	0	0.412	0	0.417	1	0.59	0	0.549	0
0.406	1	0.499	0	0.413	0	0.418	0	0.591	0	0.55	1
0.407	0	0.501	0	0.414	0	0.419	1	0.592	0	0.552	0
0.408	0	0.502	0	0.415	0	0.42	1	0.594	0	0.553	1
0.409	1	0.504	0	0.417	1	0.421	1	0.595	0	0.555	1
0.41	0	0.505	2	0.418	1	0.422	1	0.596	0	0.556	0
0.411	0	0.506	0	0.419	0	0.422	0	0.598	0	0.557	0
0.412	0	0.508	0	0.42	0	0.423	0	0.599	0	0.559	0
0.413	1	0.509	0	0.421	0	0.424	0	0.6	0	0.56	0
0.414	0	0.511	0	0.422	1	0.425	0	0.602	0	0.562	0
0.415	0	0.512	0	0.423	1	0.426	0	0.603	0	0.563	0
0.415	0	0.513	0	0.424	0	0.427	0	0.604	0	0.564	1
0.416	0	0.515	0	0.425	0	0.428	0	0.606	0	0.566	0
0.417	0	0.516	1	0.427	0	0.429	1	0.607	0	0.567	2
0.418	1	0.518	1	0.428	0	0.429	0	0.608	0	0.568	1
0.419	1	0.519	0	0.429	0	0.43	0	0.61	0	0.57	0
0.42	0	0.52	0	0.43	0	0.431	2	0.611	1	0.571	0
0.421	2	0.522	1	0.431	0	0.432	3	0.612	0	0.573	0
0.422	0	0.523	0	0.432	0	0.433	0	0.614	0	0.574	1
0.423	1	0.525	0	0.433	1	0.434	0	0.615	0	0.575	0
0.424	0	0.526	0	0.434	0	0.435	0	0.616	0	0.577	0
0.425	0	0.527	0	0.435	0	0.435	0	0.618	0	0.578	0
0.425	1	0.529	0	0.437	0	0.436	0	0.619	0	0.579	0
0.426	0	0.53	0	0.438	0	0.437	0	0.62	0	0.581	1
0.427	0	0.532	0	0.439	0	0.438	0	0.622	0	0.582	0
0.428	1	0.533	0	0.44	0	0.439	0	0.623	0	0.584	1
0.429	0	0.534	0	0.441	0	0.44	0	0.624	0	0.585	0
0.43	0	0.536	0	0.442	0	0.441	0	0.626	0	0.586	0
0.431	0	0.537	1	0.443	0	0.442	0	0.627	0	0.588	0
0.432	1	0.539	0	0.444	0	0.442	0	0.628	0	0.589	0
0.433	1	0.54	0	0.445	0	0.443	0	0.63	0	0.59	0
0.434	0	0.542	0	0.447	0	0.444	0	0.631	0	0.592	0
0.435	1	0.543	0	0.448	0	0.445	0	0.632	0	0.593	0
0.436	0	0.544	0	0.449	0	0.446	0	0.634	0	0.595	0
0.436	0	0.546	0	0.45	0	0.447	0	0.635	0	0.596	0
0.437	0	0.547	0	0.451	0	0.448	2	0.636	0	0.597	0
0.438	0	0.549	0	0.452	0	0.448	0	0.638	0	0.599	0
0.439	0	0.55	0	0.453	0	0.449	0	0.639	0	0.6	0
0.44	0	0.551	0	0.454	0	0.45	0	0.64	0	0.602	0
0.441	0	0.553	0	0.455	0	0.451	1	0.642	0	0.603	0
0.442	0	0.554	0	0.457	0	0.452	0	0.643	0	0.604	0
0.443	0	0.556	0	0.458	0	0.453	0	0.644	0	0.606	0
0.444	0	0.557	0	0.459	0	0.454	0	0.646	0	0.607	0
0.445	0	0.558	0	0.46	0	0.455	0	0.647	0	0.608	0
0.446	0	0.56	0	0.461	0	0.455	0	0.648	0	0.61	1
0.446	0	0.561	0	0.462	0	0.456	0	0.65	0	0.611	0
0.447	0	0.563	0	0.463	0	0.457	1	0.651	0	0.613	0
0.448	0	0.564	0	0.464	0	0.458	0	0.652	0	0.614	0
0.449	0	0.565	0	0.465	1	0.459	0	0.654	0	0.615	1
0.45	0	0.567	0	0.467	0	0.46	0	0.655	0	0.617	0
0.451	0	0.568	0	0.468	0	0.461	0	0.656	0	0.618	0
0.452	0	0.57	0	0.469	0	0.462	0	0.658	0	0.619	0
0.453	0	0.571	0	0.47	0	0.462	0	0.659	0	0.621	0
0.454	0	0.572	0	0.471	0	0.463	0	0.66	0	0.622	0
0.455	0	0.574	0	0.472	0	0.464	0	0.662	0	0.624	0
0.456	0	0.575	0	0.473	0	0.465	0	0.663	0	0.625	0
0.456	0	0.577	0	0.474	0	0.466	0	0.664	0	0.626	0
0.457	0	0.578	0	0.475	0	0.467	0	0.666	0	0.628	0
0.458	0	0.579	0	0.477	0	0.468	0	0.667	0	0.629	0
0.459	0	0.581	0	0.478	0	0.468	0	0.668	0	0.63	0
0.46	0	0.582	0	0.479	0	0.469	0	0.67	0	0.632	0
0.461	0	0.584	0	0.48	0	0.47	0	0.671	0	0.633	0
0.462	0	0.585	0	0.481	0	0.471	0	0.672	0	0.635	0
0.463	0	0.586	0	0.482	0	0.472	0	0.674	0	0.636	0
0.464	1	0.588	1	0.483	1	0.473	1	0.675	1	0.637	1
