# Supplementary material for: Cytosolic calcium regulates cytoplasmic accumulation of TDP-43 through Calpain-A and Importin α3
Source: eLife. 2020 Dec 11;9:e60132. doi: 10.7554/eLife.60132 (PMC7748415; doi:10.7554/eLife.60132)
Supplement: Figure 3—source data 1. [file elife-60132-fig3-data1.xlsx]

## Sheet: Fig3
Fig 3C	ATR-							ATR+
	Time (sec)	n=1	n=2	n=3	n=4	n=5		Time (sec)	n=1	n=2	n=3	n=4	n=5	n=6
	0	0.952157	1.05125	0.868539	0.886848	1.11507		1.03495	1.0664	0.914401	1.10548	0.887472	1.16	1.05228
	1.633	1.02711	1.03073	0.879237	0.983017	0.907337		0.926188	0.886866	1.27477	0.976302	1.18374	0.720774	1.00087
	3.648	1.02073	0.918021	1.25222	1.13013	0.977596		1.03886	1.04673	0.810828	0.918213	0.928792	1.11923	0.946851
	6.133	0.242633	0.218065	0.209731	0.137846	0.19083		0.24459	0.267526	0.165406	0.17965	0.261633	0.285067	0.270677
	7.639	0.258056	0.216586	0.252018	0.176842	0.170045		0.369559	0.283056	0.2346	0.352271	0.262525	0.185393	0.400758
	9.638	0.239379	0.169879	0.206276	0.205433	0.230924		0.2368	0.201234	0.191133	0.258955	0.245295	0.204584	0.288689
	11.621	0.315425	0.244156	0.245663	0.176964	0.178222		0.447687	0.354759	0.237393	0.245078	0.242538	0.300139	0.29046
	13.62	0.287556	0.198229	0.221114	0.190989	0.226254		0.287625	0.488846	0.345103	0.191022	0.440695	0.264158	0.301528
	15.634	0.29503	0.241789	0.308646	0.240638	0.217242		0.269754	0.518245	0.249861	0.256688	0.216435	0.481243	0.436411
	17.633	0.244448	0.200962	0.2938	0.185229	0.182751		0.349484	0.384414	0.269209	0.325283	0.271727	0.300423	0.329023
	19.632	0.331217	0.236594	0.30397	0.22	0.168981		0.322975	0.402389	0.257656	0.328982	0.369671	0.231975	0.251296
	21.631	0.275624	0.254793	0.292908	0.207696	0.201832		0.226814	0.468889	0.2889	0.35216	0.255927	0.405255	0.406415
	23.63	0.287175	0.210057	0.201236	0.227393	0.208068		0.362913	0.391932	0.233684	0.318556	0.330954	0.270505	0.359851
	25.644	0.331676	0.202095	0.317706	0.259102	0.252223		0.304175	0.411102	0.347082	0.237646	0.286687	0.436144	0.470926
	27.643	0.299936	0.203428	0.27504	0.233248	0.207807		0.299293	0.420104	0.238534	0.315002	0.334625	0.32656	0.274649
	29.626	0.317176	0.259712	0.348266	0.218882	0.241353		0.412081	0.480118	0.299801	0.437869	0.261676	0.334123	0.374118
	31.625	0.314267	0.275243	0.349766	0.237256	0.301012		0.264194	0.56003	0.395754	0.288075	0.374798	0.275222	0.31736
	33.64	0.336813	0.271272	0.251138	0.27618	0.487974		0.332468	0.379992	0.558011	0.283001	0.289954	0.243521	0.413801
	35.638	0.305342	0.21475	0.230732	0.253332	0.291448		0.324983	0.314234	0.336177	0.287107	0.295582	0.401667	0.436253
	37.637	0.301634	0.290311	0.244383	0.277787	0.237529		0.36634	0.37195	0.299592	0.428971	0.313051	0.330616	0.376245
	39.636	0.342897	0.296695	0.239194	0.233806	0.237371		0.363682	0.399929	0.337388	0.236855	0.323402	0.342002	0.503858
	41.619	0.331814	0.302537	0.295588	0.244539	0.285795		0.312746	0.334371	0.419567	0.334603	0.358158	0.356555	0.406867
	43.634	0.329319	0.299043	0.33547	0.255381	0.216114		0.314928	0.741026	0.397829	0.292364	0.394271	0.437927	0.416123
	45.632	0.282933	0.312164	0.263849	0.266439	0.305137		0.414779	0.330858	0.285245	0.340225	0.295099	0.509399	0.407159
	47.631	0.309968	0.244817	0.294617	0.233927	0.483878		0.316648	0.687813	0.359254	0.338603	0.337381	0.411482	0.449944
	49.63	0.32174	0.246145	0.295934	0.271891	0.244384		0.367653	0.614799	0.457269	0.341114	0.383819	0.453969	0.433792
	51.629	0.385657	0.263079	0.474972	0.246829	0.217176		0.310828	0.502812	0.371276	0.347738	0.371208	0.40476	0.36984
	53.644	0.258413	0.281688	0.36263	0.222951	0.271366		0.4281	0.389864	0.445858	0.392873	0.308607	0.422719	0.485529
	55.642	0.335989	0.318002	0.347705	0.278724	0.359435		0.301252	0.618748	0.353493	0.25785	0.341092	0.424191	0.442342
	57.641	0.313524	0.296171	0.406625	0.245838	0.42066		0.387038	0.466352	0.277764	0.368619	0.477914	0.341258	0.33213
	59.64	0.30582	0.378507	0.34206	0.248768	0.308696		0.343209	0.590893	0.582235	0.414562	0.321148	0.320869	0.445101
	61.639	0.310712	0.367775	0.477987	0.314278	0.3306		0.328289	0.547113	0.428595	0.397034	0.417288	0.33317	0.349512
	63.622	0.335536	0.241972	0.420294	0.240031	0.27293		0.286949	0.355667	0.31165	0.336382	0.273164	0.350547	0.400435
	65.636	0.33237	0.296821	0.367221	0.235159	0.303624		0.301676	0.483708	0.399019	0.385195	0.389895	0.38861	0.368427
	67.635	0.369749	0.268075	0.421646	0.227099	0.326465		0.495693	0.568742	0.380742	0.355121	0.321913	0.426983	0.312847
	69.634	0.267194	0.267274	0.312227	0.22256	0.267496		0.275898	0.429224	0.377924	0.319702	0.398271	0.390849	0.686174
	71.633	0.313096	0.310712	0.345712	0.247423	0.261612		0.423725	0.530941	0.292352	0.286208	0.23258	0.501567	0.357101
	73.632	0.316173	0.318673	0.423077	0.28391	0.389556		0.425891	0.417532	0.320277	0.256745	0.477882	0.343518	0.343674
	75.631	0.307582	0.336955	0.347494	0.287576	0.236008		0.368316	0.458199	0.534679	0.300563	0.439106	0.375273	0.385782
	77.629	0.367047	0.362716	0.353692	0.285155	0.280276		0.363468	0.502103	0.516242	0.411096	0.444488	0.423764	0.445489
	79.628	0.297311	0.307171	0.289207	0.252806	0.265749		0.749157	0.868357	0.281091	0.352733	0.246991	0.404777	0.482951
	81.627	0.291943	0.260909	0.364576	0.247466	0.316626		0.404311	0.50844	0.35107	0.417792	0.344275	0.545798	0.363703
	83.642	0.308067	0.321356	0.254284	0.272083	0.279558		0.318477	0.910536	0.340894	0.373033	0.257458	0.322521	0.397848
	85.64	0.296707	0.328034	0.39934	0.239771	0.454008		0.291251	0.590335	0.418109	0.366062	0.31345	0.447619	0.36402
	87.639	0.2514	0.251294	0.337082	0.237792	0.284503		0.352392	0.67005	0.408596	0.597115	0.416468	0.381451	0.367929
	89.638	0.352941	0.239625	0.294961	0.283314	0.411158		0.417401	0.4905	0.474466	0.283671	0.402633	0.424117	0.465362
	91.637	0.372622	0.311655	0.377551	0.222535	0.373375		0.386819	0.455144	0.333389	0.369339	0.298943	0.426126	0.575099
	93.636	0.3691	0.291117	0.335837	0.295498	0.327131		0.600692	0.385492	0.419476	0.401018	0.447484	0.355545	0.349578
	95.635	0.281949	0.323724	0.338699	0.224643	0.418549		0.386506	0.37303	0.47453	0.399082	0.306697	0.349967	0.476827
	97.633	0.379572	0.365424	0.370415	0.280253	0.440473		0.321163	0.550322	0.437047	0.54383	0.406294	0.41012	0.579071
	99.648	0.337592	0.31694	0.417124	0.304962	0.316057		0.452037	0.365004	0.417239	0.492168	0.353597	0.358662	0.715763
	101.647	0.320671	0.354705	0.4156	0.26294	0.35914		0.628347	0.705321	0.440205	0.361681	0.43369	0.46101	0.486737
	103.646	0.322351	0.324998	0.322246	0.238945	0.34368		0.480274	0.549389	0.466609	0.39251	0.491761	0.353745	0.435776
	105.629	0.361908	0.335614	0.371251	0.246623	0.226263		0.503966	0.452975	0.418767	0.324773	0.374937	0.507553	0.574858
	107.627	0.329788	0.292617	0.415892	0.233646	0.277657		0.466053	0.500929	0.471334	0.423803	0.286063	0.446221	0.467518
	109.626	0.49444	0.36584	0.31906	0.278717	0.384015		0.512645	0.306282	0.326637	0.441987	0.353501	0.392156	0.413324
	111.641	0.371451	0.303153	0.503418	0.31411	0.307207		0.465186	0.554381	0.518828	0.314919	0.277387	0.428146	0.483133
	113.64	0.285407	0.3518	0.339303	0.238765	0.289074		0.570687	0.410058	0.288662	0.592449	0.323141	0.691558	0.392782
	115.639	0.319904	0.302394	0.51649	0.328966	0.364238		0.363205	0.471761	0.384098	0.286883	0.354571	0.42599	0.509388
	117.637	0.377358	0.304632	0.429953	0.26672	0.574055		0.318632	0.497207	0.407271	0.370318	0.543302	0.323131	0.608228
	119.636	0.337191	0.274758	0.329241	0.289431	0.443407		0.35235	0.536644	0.485261	0.349522	0.330488	0.44927	0.607005
	121.635	0.353534	0.301037	0.44384	0.261984	0.344831		0.423647	0.726472	0.295193	0.340269	0.621337	0.354126	0.464466
	123.634	0.248634	0.332858	0.513386	0.29874	0.629984		0.40938	0.396561	0.326185	0.418516	0.33993	0.352786	0.425165
	125.633	0.36523	0.279055	0.441329	0.302177	0.480702		0.371159	0.389379	0.445302	0.415554	0.240116	0.334001	0.559171
	127.631	0.376702	0.352972	0.421651	0.276309	0.572958		0.433469	0.613168	0.313987	0.398877	0.490981	0.332471	0.309665
	129.63	0.313407	0.395341	0.391765	0.341793	0.463455		0.336904	0.403446	0.282951	0.401593	0.251877	0.316357	0.449636
	131.629	0.3827	0.299189	0.361333	0.274069	0.349795		0.500855	0.413391	0.485008	0.384996	0.50754	0.572439	0.456988
	133.628	0.331809	0.365696	0.289	0.316488	0.76156		0.452167	0.548659	0.406193	0.298621	0.356826	0.419679	0.456142
	135.627	0.406519	0.333207	0.43636	0.259605	0.710314		0.352532	0.466302	0.355529	0.536061	0.412731	0.547108	0.61695
	137.625	0.3415	0.278283	0.345413	0.283112	0.804742		0.414876	0.576049	0.462471	0.353303	0.284955	0.657117	0.46715
	139.64	0.270167	0.339732	0.378126	0.276284	0.341697		0.380032	0.729115	0.47648	0.385791	0.419072	0.4371	0.418352
	141.639	0.31798	0.465582	0.366718	0.271467	0.377422		0.465729	0.668973	0.303319	0.457984	0.515592	0.350445	0.562339
	143.638	0.352676	0.326106	0.396792	0.261703	0.369486		0.423261	0.508766	0.485962	0.58477	0.366817	0.317428	0.366107
	145.637	0.300731	0.325627	0.360622	0.289938	0.203148		0.479879	0.6119	0.351434	0.575015	0.34456	0.313394	0.484189
	147.635	0.386195	0.382347	0.397705	0.287441	0.299911		0.382897	0.382326	0.339396	0.383119	0.733207	0.314171	0.307846
	149.618	0.293858	0.287248	0.326511	0.262148	0.546608		0.385098	0.504261	0.380066	0.461713	0.307622	0.534656	0.414636
	151.633	0.293102	0.272707	0.425457	0.286356	0.611557		1.44967	0.473044	0.380638	0.341006	0.325759	0.354995	0.485426
	153.632	0.308151	0.341484	0.423937	0.300903	0.47253		0.632786	0.349003	0.307946	0.334577	0.43988	0.389075	0.398363
	155.631	0.364279	0.368851	0.544729	0.29225	0.531829		0.400771	0.958323	0.460844	0.51447	0.475878	0.36932	0.362041
	157.63	0.337464	0.43809	0.374187	0.262745	0.334604		0.372124	0.884433	0.563289	0.376444	0.373693	0.30117	0.540447
	159.644	0.426619	0.319364	0.326087	0.304042	0.393538		0.548137	0.549461	0.363284	0.4963	0.511255	0.395099	0.648814
	161.643	0.318659	0.444546	0.516607	0.269028	0.363416		0.547546	0.703562	0.411286	0.384674	0.3288	0.453758	0.425324
	163.642	0.317798	0.341978	0.344481	0.336795	0.32924		0.666334	0.416722	0.76453	0.337369	0.324003	0.359361	0.494413
	165.625	0.314987	0.386987	0.394224	0.305872	0.315618		0.406562	0.541493	0.535158	0.441021	0.36743	0.272223	0.43328
	167.624	0.305492	0.259134	0.611052	0.310287	0.306181		0.457143	0.558283	0.397898	0.479862	0.370287	0.583092	0.48226
	169.622	0.343634	0.437145	0.693875	0.315775	0.418928		0.700039	0.361113	0.326895	0.583327	0.354153	0.357454	0.507124
	171.637	0.304779	0.370619	0.477361	0.256255	0.384738		0.718495	0.655462	0.360595	0.308471	0.543488	0.396313	0.491416
	173.636	0.331771	0.378028	0.384289	0.268967	0.284557		0.684463	0.30912	0.367153	0.33864	0.408639	0.436728	0.384962
	175.635	0.354282	0.329748	0.560431	0.275329	0.475347		0.668795	0.748463	0.446633	0.809364	0.362435	0.249592	0.499877
	177.634	0.279346	0.351419	0.480896	0.359996	0.443186		0.424109	0.389272	0.27688	0.457972	0.286276	0.391986	0.426043
	179.632	0.26012	0.362334	0.410415	0.283003	0.287389		0.523449	0.461353	0.388498	0.487888	0.387221	0.417291	0.34773
	181.631	0.33619	0.383383	0.522458	0.281507	0.512185		0.793715	0.605011	0.313669	0.453226	0.320979	0.428035	0.492128
	183.63	0.317546	0.28354	0.482288	0.312093	0.476694		0.52287	0.422796	0.281632	0.34199	0.387771	0.366829	0.550844
	185.629	0.415905	0.434639	0.52553	0.264476	0.53532		0.468887	0.438986	0.306	0.434857	0.766964	0.320283	0.590283
	187.628	0.372164	0.31001	0.423079	0.258951	0.409187		0.592888	0.350379	0.419948	0.3974	0.453309	0.419611	0.531821
	189.626	0.335259	0.353953	0.630749	0.282136	0.421295		0.67747	0.39098	0.434662	0.439827	0.354652	0.406005	0.347993
	191.641	0.374093	0.431752	0.547808	0.330566	0.461038		0.374359	0.496999	0.290613	0.470872	0.276657	0.438154	0.360858
	193.64	0.354642	0.34333	0.555389	0.352274	0.331245		0.701292	0.461065	0.492958	0.34314	0.35198	0.306758	0.408675
	195.639	0.35769	0.341876	0.432711	0.273916	0.424925		0.435366	0.451539	0.442428	0.386351	0.33707	0.422585	0.491001
	197.638	0.342227	0.305893	0.516909	0.320279	0.829016		0.743783	0.708584	0.367659	0.419975	1.24589	0.277189	0.440624
	199.636	0.368429	0.361413	0.610184	0.294749	0.521145		0.375803	0.580146	0.460773	0.536739	0.377468	0.429025	0.478279
	201.635	0.304079	0.342889	0.434379	0.284085	0.372927		0.438384	0.317488	0.384533	0.580233	0.287567	0.624513	0.52435
	203.634	0.273309	0.339654	0.45389	0.331284	0.407619		0.538411	0.610264	0.415173	0.59124	0.665621	0.421411	0.365793
	205.633	0.330194	0.355317	0.487582	0.359213	0.337178		0.667266	0.662159	0.461497	0.393704	0.352862	0.354372	0.35676
	207.632	0.39631	0.348778	0.398946	0.333118	0.352379		0.387705	0.434873	0.391355	0.422254	0.318678	0.499618	0.498999
	209.63	0.321418	0.410436	0.565305	0.352397	0.252124		0.408594	0.58779	0.419586	0.516216	0.45464	0.334752	0.463257
	211.629	0.369152	0.39897	0.359619	0.300212	0.482908		0.545928	0.541332	0.476044	0.373131	0.393412	0.457154	0.521325
	213.628	0.321902	0.414853	0.580494	0.351046	0.327906		0.41334	0.296786	0.456297	0.311984	0.447285	0.425977	0.635255
	215.627	0.363197	0.370446	0.680863	0.2763	0.296524		0.478358	0.894617	0.48013	0.583566	0.411336	0.366684	0.294646
	217.642	0.334769	0.378603	0.420843	0.315391	0.304533		0.416921	0.489959	0.420058	0.577801	0.273791	0.456127	0.476295
	219.64	0.280594	0.270931	0.499951	0.270551	0.401225		0.431039	0.732353	0.465715	0.468966	0.394304	0.343785	0.496054
	221.639	0.302761	0.366465	0.497779	0.335322	0.260584		0.424152	0.689106	0.383143	0.360718	0.38755	0.412303	0.504865
	223.638	0.333289	0.325578	0.393352	0.324174	0.358473		0.464005	0.607498	0.33298	0.494389	0.286969	0.446294	0.520737
	225.637	0.27032	0.371696	0.455431	0.30097	0.300469		0.565794	0.556683	0.390131	0.447177	0.273987	0.464862	0.426907
	227.62	0.292455	0.297188	0.537664	0.323951	0.293713		0.657914	0.454845	0.322611	0.476278	0.255847	0.396235	0.569407
	229.619	0.380445	0.335699	0.528404	0.295041	0.65968		0.537336	0.398398	0.461185	0.393931	0.548064	0.660929	0.45929
	231.633	0.346182	0.425361	0.488205	0.301871	0.33776		0.703368	0.4028	0.4153	0.414351	0.382998	0.385759	0.534282
	233.632	0.360326	0.403025	0.357965	0.321278	0.690132		0.468941	0.392278	0.467425	0.320314	0.481301	0.478409	0.373009
	235.631	0.316485	0.39017	0.510542	0.306805	0.466784		0.582575	0.460698	0.483939	0.453226	0.361156	0.345624	0.566552
	237.63	0.323582	0.377251	0.466851	0.328202	0.313916		0.542317	0.278158	0.564909	0.482475	0.469745	0.359741	0.335086
	239.628	0.33712	0.440283	0.363728	0.363459	0.442841		0.763231	0.430373	0.399567	0.507555	0.267661	0.421773	0.443697
	241.627	0.317958	0.426497	0.359918	0.303398	0.378712		0.482757	0.326342	0.347664	0.504211	0.309219	0.405528	0.523007
	243.626	0.352809	0.380676	0.524274	0.32846	0.407816		0.503599	0.949972	0.51013	0.378738	0.543008	0.328228	0.475938
	245.625	0.322332	0.383589	0.338881	0.282956	0.629579		0.457388	0.646027	0.455751	0.437467	0.357711	0.336585	0.449268
	247.64	0.321939	0.383678	0.32846	0.303089	0.558759		0.872993	0.688168	0.384528	0.351018	0.36906	0.466349	0.436975
	249.638	0.352528	0.470651	0.45407	0.311145	0.41889		0.648403	0.339819	0.495872	0.424382	1.05491	0.335342	0.534711
	251.637	0.402927	0.401992	0.595308	0.270948	0.589143		0.406391	0.342254	0.366896	0.419065	0.476174	0.515556	0.525191
	253.636	0.342057	0.426663	0.409097	0.313317	0.427392		0.563153	0.4468	0.376246	0.421061	0.597799	0.535396	0.410374
	255.635	0.325424	0.298489	0.311557	0.377422	0.597123		0.455123	0.400564	0.435322	0.806642	0.437	0.377486	0.522657
	257.634	0.288112	0.315567	0.494931	0.366891	0.286209		0.382853	0.46288	0.380561	0.49384	0.421651	0.527534	0.449384
	259.633	0.297883	0.412591	0.496607	0.288428	0.267246		0.449685	0.367238	0.481016	0.501558	0.411616	0.496212	0.400014
	261.631	0.343333	0.36368	0.46801	0.317389	0.429756		0.531245	0.342945	0.385492	0.387242	0.507251	0.5353	0.536217
	263.63	0.423649	0.368881	0.386664	0.381199	0.84164		0.42278	0.607967	0.727671	0.378149	0.461437	0.471706	0.453363
	265.629	0.2968	0.389673	0.361997	0.325786	0.432343		0.498361	1.13884	0.532849	0.372762	0.34076	0.345877	0.482143
	267.644	0.413896	0.427992	0.34496	0.380445	0.474864		0.480399	0.535861	0.42205	0.400911	0.409318	0.287334	0.436887
	269.627	0.29681	0.376853	0.327064	0.396711	0.409876		0.528213	0.560734	0.372474	0.444241	0.246644	0.269042	0.416899
	271.641	0.395564	0.309845	0.454189	0.385597	0.226654		0.461238	0.742974	0.367116	0.462158	0.286056	0.42197	0.410453
	273.624	0.340636	0.370757	0.384783	0.280606	0.194245		0.582379	0.467736	0.644936	0.424778	0.303058	0.330689	0.463224
	275.623	0.357853	0.416191	0.404289	0.320788	0.265785		0.383446	0.577363	0.337314	0.369182	0.325582	0.432219	0.325214
	277.638	0.323181	0.373674	0.349563	0.322523	0.506696		0.86961	0.547155	0.337953	0.471313	0.435738	0.376601	0.559104
	279.637	0.317723	0.339795	0.430191	0.319125	0.372193		0.57654	0.43613	0.536197	0.347862	0.33085	0.467297	0.3698
	281.635	0.346853	0.407102	0.358718	0.297091	0.391879		0.379544	0.554256	0.342562	0.487001	0.341712	0.339997	0.419025
	283.634	0.322038	0.455137	0.440521	0.351691	0.419212		0.550491	0.475427	0.329391	0.461358	0.401013	0.423143	0.572524
	285.633	0.438924	0.438451	0.366238	0.312361	0.688444		0.548637	0.394451	0.839656	0.342623	0.381423	0.364647	0.597684
	287.632	0.336588	0.334047	0.564515	0.307332	0.71572		0.483368	0.750455	0.317594	0.392208	0.35258	0.423783	0.446894
	289.631	0.388282	0.293208	0.406557	0.338037	0.330641		0.53776	0.344489	0.436001	0.37914	0.411593	0.346372	0.450169
	291.629	0.309265	0.458573	0.398933	0.355885	0.417776		0.602485	0.457382	0.482335	0.493234	0.296654	0.402892	0.421968
	293.628	0.308387	0.385594	0.467434	0.42512	0.309758		0.286184	0.718573	0.29333	0.499223	0.295777	0.429466	0.660843
	295.643	0.413517	0.417662	0.307077	0.331915	0.858831		0.425683	0.611002	0.32852	0.404562	0.375494	0.365887	0.476208
	297.642	0.403233	0.296679	0.341535	0.291868	0.260021		1.17838	0.409746	0.350364	0.411865	0.3686	0.32825	0.576121
	299.641	0.38947	0.395532	0.505681	0.36381	0.415723		0.664939	0.570305	0.49736	0.326819	0.423772	0.378023	0.49861
