# Supplementary material for: Cytosolic calcium regulates cytoplasmic accumulation of TDP-43 through Calpain-A and Importin α3
Source: eLife. 2020 Dec 11;9:e60132. doi: 10.7554/eLife.60132 (PMC7748415; doi:10.7554/eLife.60132)
Supplement: Figure 4—source data 1. [file elife-60132-fig4-data1.xlsx]

## Sheet: Fig4+Supple
Fig 4C	Image#	Nucleus	Cytoplasm	N/C	C/N		Fig 4C	Image#	Nucleus	Cytoplasm	N/C	C/N		Fig4-S1C	Image#	Nucleus	Cytoplasm	N/C	C/N		Fig4-S1C	Image#	Nucleus	Cytoplasm	N/C	C/N		Fig4-S2B	Image#	Nucleus	Cytoplasm	N/C	C/N
Ctrl	1	122.8	53.7	2.28678	0.437296		Pkc53E Ri	1	141.32	137.76	1.02584	0.974809		Imp α1 Ri	1	50.18	23.96	2.09432	0.477481		Imp β11 Ri	1	193.27	71.96	2.6858	0.372329		Ctrl	1	58.06	113.97	0.509432	1.96297
	2	147.08	156.73	0.938429	1.06561			2	160.24	122.13	1.31204	0.762169			2	80.51	85.59	0.940647	1.0631			2	161.26	53.43	3.01815	0.331328			2	48.59	96.16	0.505304	1.97901
	3	163.17	94.56	1.72557	0.579518			3	100.26	127.81	0.784446	1.27479			3	70.42	85.21	0.826429	1.21003			3	199.98	135.61	1.47467	0.678118			3	76.38	122.25	0.624785	1.60055
	4	134.17	141.11	0.950819	1.05173			4	109.4	122.68	0.891751	1.12139			4	70.34	89.42	0.786625	1.27125			4	136.1	34.1	3.9912	0.250551			4	72.07	98.62	0.730785	1.36839
	5	162.4	74.37	2.18368	0.457943			5	69.16	90.87	0.761087	1.31391			5	76.72	114.58	0.669576	1.49348			5	128.28	56.35	2.27649	0.439273			5	63.74	111.3	0.572686	1.74616
	6	191.86	77.44	2.47753	0.403628			6	86.33	96.85	0.891378	1.12186			6	176.45	205.53	0.858512	1.16481			6	116.59	33.27	3.50436	0.285359			6	41.5	105.89	0.391916	2.55157
	7	185.7	101.33	1.83263	0.545665			7	90.58	109.26	0.829032	1.20623			7	100.53	121.2	0.829455	1.20561			7	205.17	47.61	4.30939	0.232051			7	72.38	111.47	0.649323	1.54007
	8	166.32	105.03	1.58355	0.631494		CalpA Ri	1	170.88	173.69	0.983822	1.01644			8	117.44	130.06	0.902968	1.10746			8	156.34	55.17	2.83379	0.352885			8	92.95	106.25	0.874824	1.14309
	9	183.88	43.96	4.18289	0.239069			2	180.13	121.4	1.48377	0.673958		Imp α2 Ri	1	144.76	125.33	1.15503	0.865778			9	136.63	58.85	2.32167	0.430725			9	69.47	103.41	0.671792	1.48856
	10	100.61	34.9	2.88281	0.346884			3	129.76	179.24	0.723946	1.38132			2	134.88	73.15	1.84388	0.542334		Tnpo Ri	1	190.61	130	1.46623	0.682021			10	79.55	116.2	0.684596	1.46072
	11	192.01	99.15	1.93656	0.516379			4	213.3	195.04	1.09362	0.914393			3	117.02	62.27	1.87924	0.532131			2	135.13	133.8	1.00994	0.990158			11	47.87	101.5	0.471626	2.12033
	12	187.75	72.57	2.58716	0.386525			5	160.74	103.89	1.54721	0.646323		Imp α3 Ri	1	63.44	122.27	0.518852	1.92733			3	130.39	30.04	4.34055	0.230386			12	89.79	123.83	0.725107	1.37911
	13	181	79.39	2.27988	0.438619			6	127.7	145.78	0.875978	1.14158			2	128.49	133.06	0.965655	1.03557			4	131.99	122.04	1.08153	0.924616			13	50.37	110.03	0.457784	2.18444
	14	185.38	134.24	1.38096	0.724134			7	224.1	174.29	1.28579	0.777733			3	100.19	131.39	0.762539	1.31141			5	139.3	66.52	2.09411	0.477531			14	88.57	109.33	0.810116	1.23439
	15	152.52	162.94	0.93605	1.06832			8	150.03	117.13	1.28088	0.780711			4	93.35	121.55	0.767997	1.30209			6	86.91	98.89	0.878855	1.13784			15	88.71	99.79	0.888967	1.1249
	16	111.43	117.43	0.948906	1.05385			9	90.58	157.39	0.575513	1.73758			5	99.77	162.88	0.612537	1.63255		Tnpo-SR Ri	1	69.01	118.92	0.580306	1.72323			16	65.41	105.72	0.61871	1.61627
	17	139.81	145.09	0.963609	1.03777			10	178.01	121.86	1.46077	0.684568			6	63.07	145.52	0.433411	2.30728			2	89.46	142.04	0.629823	1.58775			17	112.07	99.98	1.12092	0.892121
	18	123.76	35.39	3.49703	0.285957			11	239.2	123.06	1.94377	0.514465			7	126.44	204.85	0.617232	1.62014			3	132.62	119.08	1.11371	0.897904			18	110.49	104.93	1.05299	0.949679
	19	138.2	127.66	1.08256	0.923734			12	219.45	178.29	1.23086	0.81244			8	95.01	125.5	0.757052	1.32091			4	92.34	127.57	0.723838	1.38152			19	73.9	110.55	0.668476	1.49594
	20	171.04	106.09	1.61222	0.620264			13	173.5	203.53	0.852454	1.17308			9	113.92	164.76	0.69143	1.44628			5	83.08	115.63	0.718499	1.39179		Imp α3 O/E	1	164.69	69.41	2.37271	0.421458
	21	154.49	116.64	1.3245	0.755			14	135.18	108.67	1.24395	0.803891		Imp β1 Ri	1	147.98	148.4	0.99717	1.00284			6	186.05	41.78	4.45309	0.224563			2	141.16	110.95	1.27228	0.785988
	22	167.7	126.76	1.32297	0.755874			15	189.86	128.32	1.47958	0.675866			2	86	129.7	0.663069	1.50814			7	159.21	150.65	1.05682	0.946235			3	139.31	23.47	5.93566	0.168473
	23	124.3	100.44	1.23755	0.808045			16	185.63	144.45	1.28508	0.778161			3	74	113.54	0.651753	1.53432			8	124.6	20.97	5.94182	0.168299			4	161.06	48.36	3.33044	0.300261
	24	173.72	71.19	2.44023	0.409797			17	224.66	168.98	1.32951	0.752159			4	113.93	115.82	0.983682	1.01659		Ran Ri	1	109.9	45.12	2.43573	0.410555			5	174.54	42.77	4.0809	0.245044
	25	140.03	129.33	1.08273	0.923588		CalpB Ri	1	194	197.62	0.981682	1.01866			5	48.17	120.55	0.399585	2.50259			2	158.34	94.07	1.68321	0.594101			6	123.36	16.31	7.56346	0.132215
	26	150.96	204.62	0.737758	1.35546			2	120.49	127.21	0.947174	1.05577			6	58.83	103.07	0.570777	1.752			3	157.39	99.37	1.58388	0.631362			7	124.56	13.78	9.03919	0.110629
	27	150.27	76.3	1.96946	0.507753			3	250.07	194.96	1.28267	0.779622			7	92.89	99.5	0.933568	1.07116			4	176.9	49.18	3.59699	0.27801			8	141.6	17.41	8.13326	0.122952
	28	95.97	17.24	5.56671	0.179639			4	158.49	171.64	0.923386	1.08297			8	83.63	140.59	0.59485	1.6811			5	162.61	105.26	1.54484	0.647316			9	163	56.85	2.86719	0.348773
	29	130.3	20.66	6.30687	0.158557			5	173.99	32.31	5.38502	0.1857			9	110.93	157.37	0.704899	1.41864			6	121.22	115.4	1.05043	0.951988		Imp β1 O/E	1	146.95	10.97	13.3956	0.0746512
Cam Ri	1	115.19	148.69	0.774699	1.29082		NFAT Ri	1	130.08	40.88	3.182	0.314268			10	112.19	142.28	0.788516	1.26821			7	130.93	29.84	4.38773	0.227908			2	128	7.3	17.5342	0.0570312
	2	111.77	113.08	0.988415	1.01172			2	97.01	18	5.38944	0.185548			11	105.06	179.95	0.583829	1.71283		RanGAP Ri	1	153.35	102.88	1.49057	0.670884			3	136.68	9.31	14.681	0.0681153
	3	155.27	170.15	0.912548	1.09583			3	125.14	69.84	1.79181	0.558095			12	112.96	89.39	1.26368	0.791342			2	161.52	72.58	2.22541	0.449356			4	146.54	31.69	4.62417	0.216255
	4	152.74	129.02	1.18385	0.844703			4	83.06	51.46	1.61407	0.619552			13	132.86	166.66	0.797192	1.2544			3	144.12	118.3	1.21826	0.820844			5	124.67	8.83	14.1189	0.070827
	5	135.9	128.9	1.05431	0.948492		nej Ri	1	183.42	144.33	1.27084	0.786883			14	110.13	114.39	0.962759	1.03868			4	166.51	163.98	1.01543	0.984806			6	91.77	11.47	8.00087	0.124986
	6	132.29	140.56	0.941164	1.06251			2	189.45	109.06	1.73712	0.575666		Imp 7 Ri	1	173.62	154.77	1.12179	0.89143			5	136.83	61.06	2.24091	0.446247			7	86.36	105.68	0.817184	1.22371
	7	96.43	114.65	0.841082	1.18895			3	162.91	112.43	1.44899	0.690136			2	136.23	79.75	1.70821	0.585407			6	132.34	133.81	0.989014	1.01111			8	81.11	95.74	0.84719	1.18037
	8	45.85	58.08	0.789428	1.26674			4	167.3	75.67	2.21092	0.452301			3	206.39	222.68	0.926846	1.07893		Rcc1 Ri	1	197.22	57.32	3.44068	0.29064			9	45.9	91.43	0.502023	1.99194
	9	64.26	86.96	0.73896	1.35325			5	149.22	73.24	2.03741	0.490819			4	80.67	100.84	0.79998	1.25003			2	127.96	32.52	3.93481	0.254142		Imp α3 O/E +Imp β1 O/E	1	117.62	7.41	15.8731	0.0629995
	10	58.01	120.17	0.482733	2.07154			6	137.54	62.28	2.20841	0.452814			5	174.26	159.11	1.09522	0.913061			3	108.95	13.62	7.99927	0.125011			2	98.38	10.09	9.75025	0.102561
	11	101.43	86	1.17942	0.847875			7	142.1	42.98	3.30619	0.302463			6	115.49	133.66	0.864058	1.15733			4	91.12	14.42	6.319	0.158253			3	113.59	6.8	16.7044	0.0598644
	12	96.91	77.69	1.24739	0.801672			8	140.05	74.64	1.87634	0.532953			7	96.68	123.86	0.780559	1.28113		Ntf-2 Ri	1	82.12	26.68	3.07796	0.32489			4	102.17	11.9	8.58571	0.116473
	13	80.56	75.48	1.0673	0.936941			9	152.1	51.15	2.97361	0.336292			8	119.37	164.84	0.724157	1.38092			2	60.03	26.43	2.27128	0.44028			5	122.4	7.25	16.8828	0.059232
	14	55.47	71.31	0.777871	1.28556		CrebB Ri	1	163.28	50.97	3.20345	0.312163										3	80.91	71.6	1.13003	0.884934			6	90.76	6.47	14.0278	0.0712869
	15	95.61	52.29	1.82846	0.546909			2	139.51	76.57	1.82199	0.54885										4	116.54	98.18	1.187	0.842458			7	109.6	18.47	5.93395	0.168522
CanA-14F Ri	1	153.56	30.53	5.02981	0.198815			3	177.97	117.63	1.51296	0.660954																	8	135.24	20.09	6.73171	0.148551
	2	194.76	73.84	2.63759	0.379133			4	143.16	67.2	2.13036	0.469405																	9	110.47	20.91	5.28312	0.189282
	3	124.53	50.99	2.44224	0.40946			5	145.3	121.82	1.19274	0.838403
CanB Ri	1	69.58	33.98	2.04768	0.488359			6	142.89	36.39	3.92663	0.254671
	2	126.24	44.78	2.81912	0.354721			7	87.01	83.93	1.0367	0.964602
	3	116.67	29.3	3.98191	0.251136			8	126.06	130.17	0.968426	1.0326
	4	93.63	20.4	4.58971	0.217879			9	164	141.16	1.1618	0.860732
	5	153.17	38.95	3.93248	0.254293			10	153.49	177.7	0.863759	1.15773
	6	132.47	44.38	2.9849	0.335019			11	99.85	48.9	2.04192	0.489735
	7	148.18	51.5	2.87728	0.34755			12	155.57	143.32	1.08547	0.921257
	8	91.82	20.06	4.57727	0.218471			13	144.49	95.49	1.51314	0.660876
	9	80.41	19.43	4.13845	0.241637
	10	59.45	26.68	2.22826	0.44878
CaMKI Ri	1	179.94	84.02	2.14163	0.466933
	2	68.25	86.3	0.790846	1.26447
	3	101.33	61.84	1.63858	0.610283
	4	212.69	175.14	1.2144	0.823452
	5	141.51	147.68	0.95822	1.0436
	6	117.71	120.59	0.976117	1.02447
	7	140.87	112.92	1.24752	0.80159
	8	169.65	123.88	1.36947	0.730209
	9	195.3	148.22	1.31764	0.758935
	10	155.26	70.31	2.20822	0.452853
	11	207.68	114.7	1.81064	0.552292
	12	178.45	80.11	2.22756	0.448921
	13	103.71	153.45	0.675855	1.47961
	14	158.45	84.67	1.87138	0.534364
	15	178.29	94.55	1.88567	0.530316
CaMKII Ri	1	120.02	86.35	1.38992	0.719463
	2	94.1	136.16	0.691099	1.44697
	3	111.51	127.62	0.873766	1.14447
	4	134.82	120.61	1.11782	0.8946
	5	155.85	41.66	3.741	0.267308
	6	176.29	36.18	4.87258	0.20523
	7	167.2	81.93	2.04077	0.490012
	8	131.91	151.87	0.868572	1.15132
	9	210.18	171.36	1.22654	0.815301
Pka-C1 Ri	1	166.76	42.81	3.89535	0.256716
	2	172.23	56.33	3.05752	0.327063
	3	165.22	39.51	4.18173	0.239136
	4	80.04	58.47	1.36891	0.73051
	5	104.84	24.46	4.28618	0.233308
	6	66.67	66.96	0.995669	1.00435
	7	110.48	76.65	1.44136	0.693791
	8	92.46	83.97	1.10111	0.908177
	9	114.73	27.82	4.12401	0.242482
