# Supplementary material for: Cytosolic calcium regulates cytoplasmic accumulation of TDP-43 through Calpain-A and Importin α3
Source: eLife. 2020 Dec 11;9:e60132. doi: 10.7554/eLife.60132 (PMC7748415; doi:10.7554/eLife.60132)
Supplement: Figure 5—source data 1. [file elife-60132-fig5-data1.xlsx]

## Sheet: Fig5+Supple
Fig 5B	Image#	Nucleus	Cytoplasm	N/C	C/N		Fig 5D	Image#	Nucleus	Cytoplasm	N/C	C/N		Fig 5F	Image#	Nucleus	Cytoplasm	N/C	C/N		Fig5-S1B	Image#	Nucleus	Cytoplasm	N/C	C/N
Ctrl(120h AEL)	1	78.868	104.076	0.757792	1.31962		Ctrl	1	164.85	127.34	1.29457	0.77246		Ctrl	1	50.74	72	0.704722	1.419		Ctrl	1	102.89	104.73	0.982431	1.01788
	2	79.243	120.644	0.656833	1.52246			2	80.21	110.6	0.725226	1.37888			2	48.57	116.27	0.417735	2.39386			2	103.35	88.94	1.16202	0.860571
	3	61.022	102.023	0.59812	1.67191			3	253.8	92.23	2.75182	0.363396			3	49.22	116.28	0.423289	2.36245			3	89.28	102	0.875294	1.14247
	4	65.119	75.825	0.858806	1.16441			4	258.96	90.36	2.86587	0.348934			4	58.9	156.29	0.376864	2.65348			4	99.08	124.09	0.798453	1.25242
	5	96.833	99.24	0.975746	1.02486			5	251.3	63.19	3.9769	0.251452			5	46.68	90.26	0.517173	1.93359			5	98.26	117	0.839829	1.19072
	6	96.527	102.252	0.944011	1.05931			6	242.18	81.48	2.97226	0.336444			6	44.68	133.25	0.33531	2.98232			6	114.09	112.03	1.01839	0.981944
Ctrl(18h APF)	1	115.799	110.486	1.04809	0.954119			7	108.54	125.91	0.862044	1.16003			7	70.84	120.71	0.586861	1.70398		CalpA O/E	1	102.58	81.68	1.25588	0.796257
	2	163.78	142.684	1.14785	0.871193			8	103.95	104.74	0.992458	1.0076			8	86.66	170.98	0.506843	1.973			2	124.22	91.92	1.35139	0.739977
	3	226.739	136.008	1.6671	0.599844			9	203.44	70.69	2.87792	0.347473			9	56.02	94.27	0.594251	1.68279			3	115.1	102.87	1.11889	0.893745
	4	184.921	139.453	1.32605	0.754122			10	183.47	45.19	4.05997	0.246307			10	94.11	129.44	0.727055	1.37541			4	87.61	96.87	0.904408	1.1057
	5	245.366	106.518	2.30352	0.434119			11	102.89	104.73	0.982431	1.01788			11	55.42	106.03	0.522682	1.91321			5	105.38	90.02	1.17063	0.854242
	6	151.415	139.873	1.08252	0.923772			12	103.35	88.94	1.16202	0.860571			12	89.29	159.28	0.560585	1.78385			6	165.5	105.48	1.56902	0.637341
	7	168.361	148.928	1.13049	0.884575			13	89.28	102	0.875294	1.14247		SERCA Ri	1	169.84	62.33	2.72485	0.366992			7	171.12	69.17	2.4739	0.404219
	8	204.157	156.129	1.30762	0.76475			14	99.08	124.09	0.798453	1.25242			2	172.33	122.9	1.4022	0.713167			8	164.76	77.8	2.11774	0.472202
	9	145.655	132.14	1.10228	0.907212			15	98.26	117	0.839829	1.19072			3	163.27	117.92	1.38458	0.722239			9	196.24	34.55	5.67988	0.17606
CalpA Ri	1	78.067	81.291	0.96034	1.0413			16	114.09	112.03	1.01839	0.981944			4	148.54	110.42	1.34523	0.743369			10	196.81	74.99	2.62448	0.381027
	2	58.044	57.026	1.01785	0.982462			17	70.79	111.57	0.63449	1.57607			5	145.03	53.03	2.73487	0.365648			11	214.98	24.45	8.79264	0.113732
	3	87.497	86.333	1.01348	0.986697			18	80.266	105.099	0.763718	1.30938			6	141.47	145.99	0.969039	1.03195			12	203	27.26	7.44681	0.134286
	4	109.32	113.441	0.963673	1.0377			19	76.14	112.743	0.675341	1.48073			7	130.06	117.83	1.10379	0.905966			13	180.4	47.33	3.81154	0.262361
	5	146.907	119.101	1.23347	0.810724		SERCA Ri	1	196.35	39.11	5.02046	0.199185			8	137.78	20.92	6.58604	0.151836			14	156.73	63.63	2.46315	0.405985
	6	113.107	144.23	0.784213	1.27516			2	153.88	9.44	16.3008	0.0613465		SERCA Ri+ Imp α3 Ri	1	60.98	101.88	0.598547	1.67071			15	208.11	24.25	8.58186	0.116525
	7	71.483	112.899	0.633159	1.57938			3	89.85	105.28	0.853438	1.17173			2	63.39	94.8	0.668671	1.4955			16	213.38	72.12	2.95868	0.337989
	8	116.039	137.733	0.842492	1.18695			4	113.27	115.4	0.981542	1.0188			3	42.96	86.04	0.499303	2.00279			17	223.16	24.61	9.06786	0.11028
	9	111.052	122.183	0.908899	1.10023			5	191.48	64.95	2.94811	0.3392			4	53.2	80	0.665	1.50376			18	150.04	74.09	2.0251	0.493802
								6	128.88	68.14	1.8914	0.528709			5	67.07	95.8	0.700104	1.42836
								7	166.76	2.79	59.7706	0.0167306			6	45.11	93.77	0.481071	2.0787
								8	192.58	33.5	5.74866	0.173954
							SERCA Ri + CalpA Ri	1	120.52	120.88	0.997022	1.00299
								2	97.07	128.69	0.754293	1.32574
								3	110.66	113.96	0.971042	1.02982
								4	121.13	125.12	0.968111	1.03294
								5	81.22	120.61	0.67341	1.48498
								6	89.66	109.93	0.81561	1.22608
								7	93.37	108.13	0.863498	1.15808
								8	109.04	105.26	1.03591	0.965334
								9	188.8	35.77	5.27817	0.18946
								10	180.7	15.49	11.6656	0.0857222
								11	107.33	122.35	0.877237	1.13994
								12	96.42	106.89	0.902049	1.10859
