# Supplementary material for: Cytosolic calcium regulates cytoplasmic accumulation of TDP-43 through Calpain-A and Importin α3
Source: eLife. 2020 Dec 11;9:e60132. doi: 10.7554/eLife.60132 (PMC7748415; doi:10.7554/eLife.60132)
Supplement: Figure 6—source data 1. [file elife-60132-fig6-data1.xlsx]

## Sheet: Fig6+Supple
Fig 6B	Image#	Dendritic length		Fig 6C	Image#	Branch points		Fig 6F	Image#	Dendritic length		Fig 6G	Image#	Branch points		Fig 6-S1E	Image#	Dendritic length		Fig 6-S1F	Image#	Branch points		Fig 6-S2E	Image#	Dendritic length
Ctrl	1	19141		Ctrl	1	803		TBPH O/E	1	5498		TBPH O/E	1	708		TBPH O/E	1	17610		TBPH O/E	1	801		Ctrl	1	22534
	2	24239			2	1090			2	9155			2	1269			2	21433			2	1064			2	20797
	3	25141			3	1058			3	8685			3	1057			3	11517			3	693			3	19822
	4	23187			4	1081			4	8450			4	935			4	16809			4	811		TBPH O/E	1	12909
	5	24033			5	1220			5	17408			5	1255			5	17364			5	711			2	7222
	6	23294			6	1060			6	15808			6	1198			6	15071			6	646			3	11446
	7	24632			7	1123			7	11312			7	732		TBPH O/E+ Imp α3 O/E	1	10986		TBPH O/E+ Imp α3 O/E	1	268			4	11432
	8	25164			8	1103			8	15917			8	1323			2	11854			2	258			5	12221
TDP-43 WT O/E	1	11470		TDP-43 WT O/E	1	378			9	12129			9	767			3	9758			3	166			6	8044
	2	14234			2	602			10	11189			10	681			4	12476			4	308			7	17172
	3	14767			3	585			11	16877			11	1200			5	7604			5	161			8	17302
	4	13539			4	499			12	17044			12	1257			6	16764			6	610			9	14210
	5	13604			5	476			13	14229			13	1260			7	11392			7	362			10	12891
	6	10074			6	295		+ SERCA Ri	1	3077		+ SERCA Ri	1	254			8	9119			8	255			11	8743
	7	13356			7	410			2	5212			2	600		TBPH O/E+ Imp α3 Ri	1	32353		TBPH O/E+ Imp α3 Ri	1	1405		TBPH O/E+ Hrb27C Ri	1	21185
	8	12574			8	339			3	4210			3	479			2	19791			2	755			2	19480
	9	11846			9	468			4	6734			4	842			3	22280			3	968			3	14632
	10	15983			10	775			5	5096			5	624			4	26802			4	1310			4	18494
	11	13181			11	621			6	4775			6	619			5	24672			5	1092			5	13609
	12	12847			12	511			7	4500			7	652			6	21790			6	883			6	12315
	13	9708			13	567			8	5180			8	718			7	22884			7	755
	14	8218			14	426			9	4850			9	614
	15	10274			15	563			10	4505			10	548
	16	9918			16	495			11	3369			11	379
	17	14507			17	565		+ Itpr Ri	1	18842		+ Itpr Ri	1	1699
	18	11470			18	378			2	20789			2	2051
	19	14234			19	602			3	10929			3	1033
	20	14767			20	585			4	14520			4	1495
	21	13539			21	499			5	14312			5	1172
	22	13604			22	476			6	11190			6	894
	23	10074			23	295			7	14636			7	1709
	24	13356			24	410			8	17711			8	1484
	25	12574			25	339			9	18939			9	1711
	26	12145			26	481
	27	9372			27	409		Fig 6-S1B	Image#	Dendritic length		Fig 6-S1C	Image#	Branch points
	28	12041			28	443		TBPH O/E	1	8161		TBPH O/E	1	637
	29	14507			29	565			2	5407			2	459
TDP-43-ΔNLS O/E	1	16346		TDP-43-ΔNLS O/E	1	824			3	6064			3	424
	2	16286			2	849			4	2879			4	236
	3	13486			3	870			5	5820			5	595
	4	14636			4	867			6	5841			6	548
	5	15038			5	703			7	11683			7	973
	6	15916			6	728			8	14226			8	1183
	7	15089			7	678			9	10463			9	793
	8	15347			8	948		+ Itpr sv35/+	1	12982		+ Itpr sv35/+	1	1146
	9	16828			9	592			2	15050			2	1290
	10	18753			10	776			3	11506			3	989
	11	13675			11	745			4	17633			4	1484
	12	13924			12	767			5	12971			5	1162
	13	16346			13	824			6	15856			6	1406
	14	16286			14	849			7	11214			7	680
	15	15089			15	870			8	15593			8	1196
	16	15347			16	867			9	18110			9	1789
	17	16828			17	703			10	14424			10	1063
	18	18753			18	728		+ Itpr ka1091/+	1	10620		+ Itpr ka1091/+	1	809
	19	13675			19	678			2	10632			2	812
	20	13924			20	948			3	10971			3	857
									4	19629			4	1557
									5	13314			5	976
									6	16515			6	1197
									7	15415			7	1234
									8	11885			8	936
