# Supplementary material for: Cytosolic calcium regulates cytoplasmic accumulation of TDP-43 through Calpain-A and Importin α3
Source: eLife. 2020 Dec 11;9:e60132. doi: 10.7554/eLife.60132 (PMC7748415; doi:10.7554/eLife.60132)
Supplement: Figure 7—source data 1. [file elife-60132-fig7-data1.xlsx]

## Sheet: Fig7+Supple
Fig 7B	image #	Nucleus	Cytoplasm	N/C	C/N		Fig 7B	image #	Nucleus	Cytoplasm	N/C	C/N		Fig 7D													Fig 7-S4B
w1118 (Ctrl)	1	123.37	66.5	1.85519	0.539029		w1118 (SERCA Ri)	1	71.15	39.55	1.79899	0.555868			w1118 (Ctrl)			w1118 (SERCA Ri)			GR100 O/E (Ctrl)			GR100 O/E (SERCA Ri)			Ctrl	1
	2	110.69	87.31	1.26778	0.788779			2	81.87	50.3	1.62763	0.614389			Distance moved			Distance moved			Distance moved			Distance moved				1
	3	109.1	68.59	1.59061	0.628689			3	101.69	57.31	1.77438	0.563576			center-point			center-point			center-point			center-point			CalpA O/E	4.18322
	4	105.4	69.62	1.51393	0.660531			4	83.68	48.35	1.73071	0.577796			10cm			10cm			10cm			10cm				3.37399
	5	95.37	56.1	1.7	0.588235			5	78.04	47.67	1.63709	0.610841
	6	123.58	80.85	1.52851	0.654232			6	68.27	37.76	1.808	0.553098		Trial 1	1.15577		Trial 1	0.537453		Trial 1	1.15115		Trial 1	0.594302
	7	113.97	71.87	1.58578	0.630605			7	61.19	36.49	1.6769	0.596339		Trial 2	1.16216		Trial 2	0.817935		Trial 2	0.409417		Trial 2	0.236162
	8	94.57	68.97	1.37118	0.729301			8	58.83	37.23	1.58018	0.63284		Trial 3	1.43494		Trial 3	0.635979		Trial 3	0.46284		Trial 3	0.840919
	9	89.95	67.57	1.33121	0.751195			9	87.68	51.88	1.69005	0.591697		Trial 4	1.25466		Trial 4	1.05472		Trial 4	0.549878		Trial 4	0.970058
	10	108.35	74.41	1.45612	0.686756			10	76.75	50.12	1.53132	0.653029		Trial 5	0.805307		Trial 5	0.766897		Trial 5	0.505976		Trial 5	1.15325
	11	113.38	61.87	1.83255	0.545687			11	121.39	77.79	1.56048	0.640827		Trial 6	0.70538		Trial 6	1.32652		Trial 6	0.451237		Trial 6	1.26087
	12	114.24	62.03	1.84169	0.54298			12	113.87	66.47	1.7131	0.583736		Trial 7	1.5373		Trial 7	1.4126		Trial 7	0.44642		Trial 7	0.6558
	13	116.63	68.06	1.71364	0.583555			13	107.5	66.02	1.62829	0.61414		Trial 8	1.23232		Trial 8	0.976944		Trial 8	0.534747		Trial 8	0.453035
	14	118.22	68.34	1.72988	0.578075			14	116.35	73.92	1.574	0.635324		Trial 9	1.15092		Trial 9	1.05333		Trial 9	0.599287		Trial 9	0.781964
	15	118.71	70.99	1.67221	0.598012			15	130.14	79.99	1.62695	0.614646		Trial 10	1.44594		Trial 10	1.10273		Trial 10	0.495569		Trial 10	0.925177
	16	132.86	78.84	1.68519	0.593407			16	115.48	70.02	1.64924	0.606339		Trial 11	0.640623		Trial 11	0.543416		Trial 11	0.226835		Trial 11	0.631521
	17	127.65	73.16	1.74481	0.57313			17	102.98	66.73	1.54323	0.64799		Trial 12	1.21306		Trial 12	1.02392		Trial 12	0.622415		Trial 12	0.646848
	18	158.57	92.9	1.70689	0.585861			18	95.76	64.37	1.48765	0.672201		Trial 13	0.692448		Trial 13	0.763562		Trial 13	0.343866		Trial 13	0.80857
	19	131.82	74.5	1.7694	0.565165			19	81.44	52.3	1.55717	0.642191		Trial 14	0.567941		Trial 14	0.938329		Trial 14	0.274791		Trial 14	0.576939
	20	114.83	75.37	1.52355	0.656362			20	86.26	60.92	1.41596	0.706237		Trial 15	0.991581		Trial 15	1.10611		Trial 15	0.308126		Trial 15	0.487163
	21	93.79	56.38	1.66353	0.60113		PR100 O/E (SERCA Ri)	1	102.54	72.79	1.40871	0.709869		Trial 16	1.01877		Trial 16	1.14948		Trial 16	0.352055		Trial 16	0.577839
	22	118.13	86.37	1.36772	0.731144			2	108.23	80.32	1.34749	0.742123		Trial 17	1.17586		Trial 17	1.16566		Trial 17	0.390876		Trial 17	0.505642
	23	121.59	79.97	1.52045	0.657702			3	89.96	74.86	1.20171	0.832148		Trial 18	0.792873		Trial 18	0.913651		Trial 18	0.393766		Trial 18	0.684426
	24	104.43	72.37	1.443	0.693			4	103.04	76.11	1.35383	0.738645		Trial 19	0.980272		Trial 19	1.18841		Trial 19	0.44731		Trial 19	0.820892
	25	83.87	45.81	1.83082	0.546202			5	98.15	67.86	1.44636	0.691391		Trial 20	1.02085		Trial 20	1.07003		Trial 20	0.316814		Trial 20	0.440386
	26	72.78	50.12	1.45211	0.688651			6	91.44	63.59	1.43796	0.695429		Trial 21	0.805662		Trial 21	0.972967		Trial 21	0.736897		Trial 21	0.383965
	27	85.16	52.28	1.62892	0.613903			7	93.68	66.61	1.4064	0.711038		Trial 22	1.03966		Trial 22	1.38963		Trial 22	0.560824		Trial 22	0.293714
	28	129.29	64.22	2.01324	0.496713			8	102.09	77.6	1.31559	0.760114		Trial 23	0.58757		Trial 23	1.11769		Trial 23	0.186822		Trial 23	0.472028
	29	92.69	60.29	1.5374	0.650448			9	91.89	62.31	1.47472	0.678093					Trial 24	1.08032		Trial 24	0.510479
	30	112.61	62.5	1.80176	0.555013			10	85.94	57.45	1.49591	0.66849					Trial 25	1.34771		Trial 25	0.158629
PR100 O/E (Ctrl)	1	89.48	71.4	1.25322	0.797944			11	101.86	71.27	1.42921	0.699686					Trial 26	1.61023		Trial 26	0.540581
	2	83.74	60.53	1.38345	0.722833			12	103.58	67.79	1.52795	0.65447					Trial 27	1.05082		Trial 27	0.689502
	3	68.28	52.41	1.3028	0.767575			13	94.74	62.23	1.52242	0.65685					Trial 28	1.21443		Trial 28	0.593301
	4	75.39	48.58	1.55187	0.644383			14	119.27	66.57	1.79165	0.558145
	5	77.12	52.21	1.47711	0.676997			15	99.12	80.98	1.22401	0.81699
	6	67.91	59.33	1.14461	0.873656			16	117.17	79.44	1.47495	0.677989
	7	114.96	86.06	1.33581	0.748608			17	87.6	66.56	1.31611	0.759817
	8	63.41	50.55	1.2544	0.797193			18	74.67	56.4	1.32394	0.755323
	9	78.77	64.72	1.21709	0.821633			19	97.82	77.56	1.26122	0.792885
	10	64.6	52.55	1.22931	0.813467			20	97.24	67.57	1.4391	0.694879
	11	108.36	78.73	1.37635	0.72656		GR100 O/E (SERCA Ri)	1	86.33	59.1	1.46074	0.684582
	12	116.96	84.93	1.37713	0.726146			2	85.59	53.95	1.58647	0.630331
	13	106.06	79.14	1.34016	0.746181			3	85.69	55.23	1.55151	0.644533
	14	99.59	73.99	1.34599	0.742946			4	101.94	75.41	1.35181	0.739749
	15	113.79	85.96	1.32376	0.755427			5	100.13	68.5	1.46175	0.684111
	16	115.96	81.31	1.42615	0.70119			6	76.3	51.03	1.4952	0.668807
	17	106.21	77.82	1.36482	0.732699			7	69.65	51.52	1.3519	0.739698
	18	108.23	82.93	1.30508	0.766239			8	92.71	59.58	1.55606	0.642649
	19	103.33	78.37	1.31849	0.758444			9	80	54.53	1.46708	0.681625
	20	103.41	80.09	1.29117	0.77449			10	111.54	81	1.37704	0.726197
GR100 O/E (Ctrl)	1	99.72	68.84	1.44858	0.690333			11	64.43	48.05	1.34089	0.745771
	2	94.25	64.43	1.46283	0.683607			12	65.67	53.28	1.23255	0.811329
	3	95.34	71.01	1.34263	0.744808			13	64.34	47.78	1.34659	0.742617
	4	97.64	77.52	1.25955	0.793937			14	59.66	46.1	1.29414	0.772712
	5	98.88	78.16	1.2651	0.790453			15	47.86	37.28	1.2838	0.778939
	6	106.29	87.04	1.22116	0.818892			16	52.59	42.16	1.24739	0.801673
	7	110.5	87.71	1.25983	0.793756			17	71.76	55.9	1.28372	0.778986
	8	87.49	70.05	1.24897	0.800663			18	61.71	47.29	1.30493	0.766326
	9	102.39	73.81	1.38721	0.720871			19	59.09	50.96	1.15954	0.862413
	10	93.63	74.13	1.26305	0.791733			20	66.27	51.31	1.29156	0.774257
	11	85.67	71.77	1.19367	0.83775			21	50.52	39.97	1.26395	0.791172
	12	88.43	73.99	1.19516	0.836707			22	43.71	37.64	1.16126	0.86113
	13	89.92	73.9	1.21678	0.821842			23	57.81	43.22	1.33758	0.747622
	14	81.7	65.07	1.25557	0.79645			24	45.83	36.35	1.2608	0.793149
	15	87.44	66.32	1.31846	0.758463			25	55.9	46.45	1.20344	0.830948
	16	70.23	65.12	1.07847	0.927239			26	76.92	52.2	1.47356	0.678627
	17	88.15	66.02	1.3352	0.748951			27	62.6	47.13	1.32824	0.752875
	18	95.05	72.7	1.30743	0.764861			28	88.61	60.87	1.45573	0.686943
	19	92.08	76.17	1.20887	0.827215			29	95.72	72.26	1.32466	0.75491
	20	94.99	71.63	1.32612	0.754079			30	56.48	51.56	1.09542	0.91289
	21	73.27	61.7	1.18752	0.842091
	22	99.53	74.99	1.32724	0.753441
	23	78.3	66.17	1.18332	0.845083
	24	84.78	76.2	1.1126	0.898797
	25	86.29	71.86	1.20081	0.832773
	26	66.74	54.04	1.23501	0.809709
	27	76.46	70.44	1.08546	0.921266
	28	82.22	52.81	1.5569	0.642301
	29	88.14	61.87	1.4246	0.701951
	30	66.75	53.27	1.25305	0.798052
									Nuc	Cyt		C/N
							SERCA Ri ; D42>RFP x GR100	1	86.33	59.1	1.46074	0.684582
								2	85.59	53.95	1.58647	0.630331
								3	85.69	55.23	1.55151	0.644533
								4	101.94	75.41	1.35181	0.739749
								5	100.13	68.5	1.46175	0.684111
								6	76.3	51.03	1.4952	0.668807
								7	69.65	51.52	1.3519	0.739698
								8	92.71	59.58	1.55606	0.642649
								9	80	54.53	1.46708	0.681625
								10	111.54	81	1.37704	0.726197
							2019.4.3	1	40.4	32.6	1.23926	0.806931
								2	55.35	45.86	1.20693	0.828546
								3	82.03	59	1.39034	0.719249
								4	54.45	44.31	1.22884	0.813774
								5	55.26	44.29	1.24769	0.801484
								6	55.86	45.58	1.22554	0.815968
								1	33.29	23.28	1.42998	0.699309
								2	47.12	37.9	1.24327	0.804329
								3	42.67	30.43	1.40223	0.713147
								4	31.43	26.6	1.18158	0.846325
								5	44.32	35.18	1.25981	0.793773
								6	40.17	26.14	1.53673	0.650734
								7	37.69	27.49	1.37104	0.729371
								8	33.24	23.13	1.43709	0.695848
								9	42.31	28.91	1.46351	0.68329
								10	43.27	31.32	1.38155	0.723827
