# Supplementary material for: Cytosolic calcium regulates cytoplasmic accumulation of TDP-43 through Calpain-A and Importin α3
Source: eLife journal article supplement (doi:10.7554/elife.60132), 2020-12-11
Supplement: supp [file elife-60132-supp-v1.zip]

**A**

| Nuclear transport machinery genes | Human homologue | Ri transgenic lines |
|-----------------------------------|-----------------|---------------------|
| Cargo carrier genes               |                 |                     |
| <i>Imp α1/ Kap-α1</i>             | <i>KPNA1</i>    | BL27523             |
| <i>Imp α2/ Pen</i>                | <i>KPNA2</i>    | BL27692             |
| <i>Imp α3/ Kap-α3</i>             | <i>KPNA4</i>    | 106249KK            |
| <i>Imp β1/ Fs(2)Ket</i>           | <i>KPNB1</i>    | BL31242             |
| <i>Imp 7/ msk</i>                 | <i>IPO7</i>     | BL33626             |
| <i>Imp β11</i>                    | <i>IPO11</i>    | BL55142             |
| <i>Tnpo</i>                       | <i>Tnpo1</i>    | BL50732             |
| <i>Tnpo-SR</i>                    | <i>Tnpo3</i>    | BL56974             |
| Regulator genes                   |                 |                     |
| <i>Ran</i>                        | <i>RAN</i>      | BL42482             |
| <i>RanGAP</i>                     | <i>RANGAP1</i>  | 108264KK            |
| <i>Rcc1</i>                       | <i>RCC1</i>     | 110321KK            |
| <i>Ntf-2</i>                      | <i>NUTF2</i>    | BL28633             |

**B**

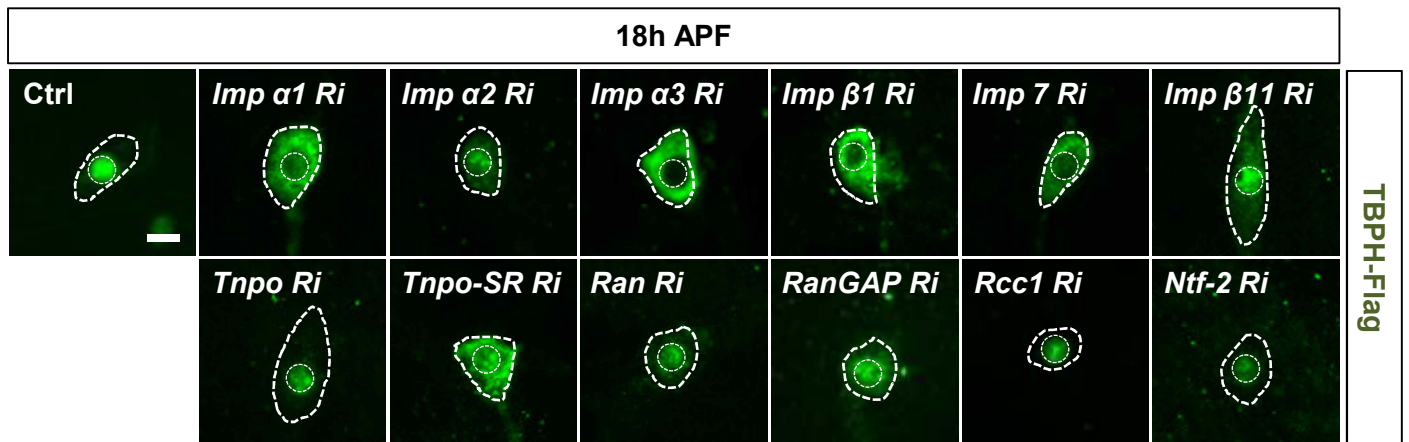

**C**

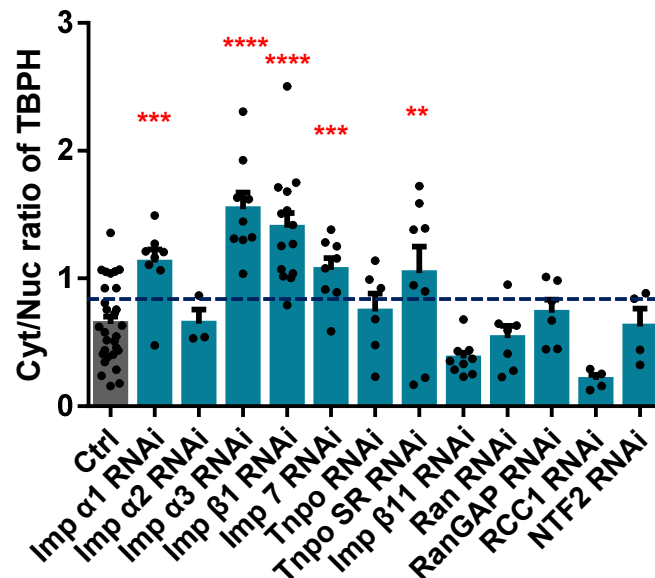

Figure 4-figure supplement 1
