# Supplementary material for: Cytosolic calcium regulates cytoplasmic accumulation of TDP-43 through Calpain-A and Importin α3
Source: eLife journal article supplement (doi:10.7554/elife.60132), 2020-12-11
Supplement: supp [file elife-60132-supp-v1.zip]

**A**

| mRNA splicing-related gene         | Fly homologue |
|------------------------------------|---------------|
| <i>HNRNPA2B1</i> ( <i>Hrb87F</i> ) | CG12749       |
| <i>HNPNA2B1</i> ( <i>Hrb98DE</i> ) | CG9983        |
| <i>DAZAP1</i> ( <i>Hrb27C</i> )    | CG10377       |
| <i>HNRNPC</i>                      | CG42458       |
| <i>HNRNPH1</i> ( <i>glo</i> )      | CG6946        |
| <i>HNRNPU1</i>                     | CG30122       |
| <i>HNRNPL</i> ( <i>sm</i> )        | CG9218        |
| <i>HNRNPR</i> ( <i>Syp</i> )       | CG17838       |

**B**

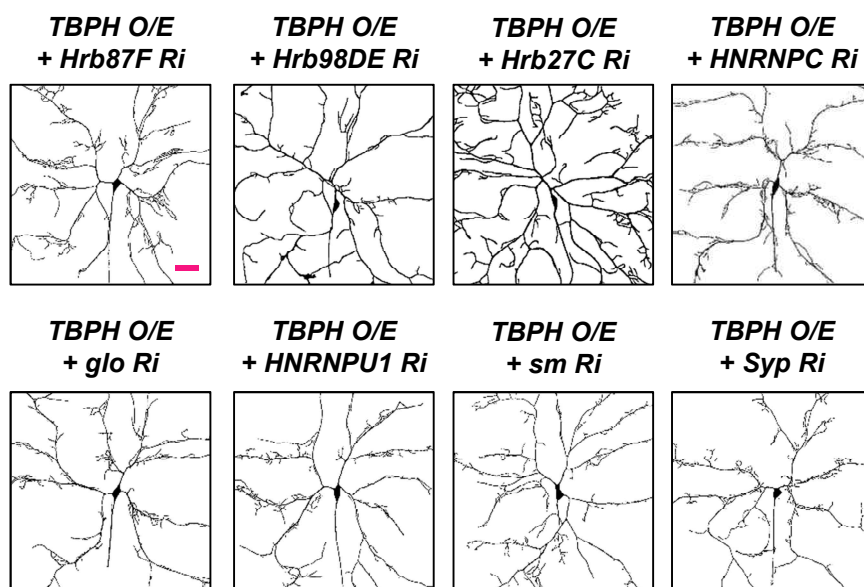

**C**

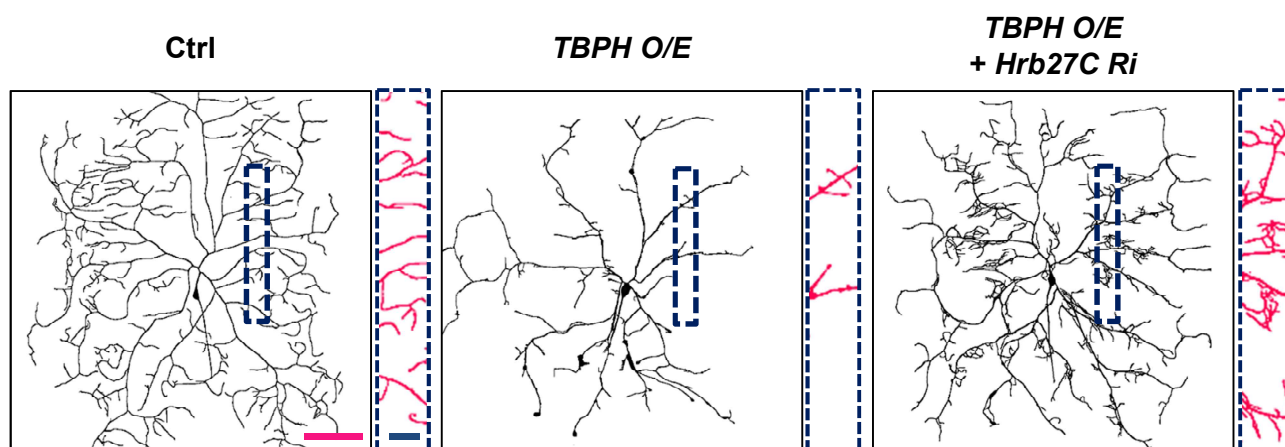

**D**

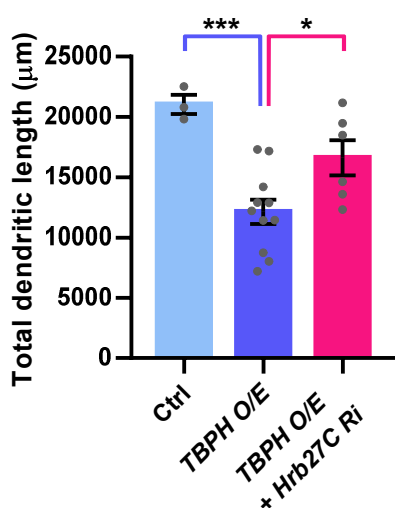

**E**

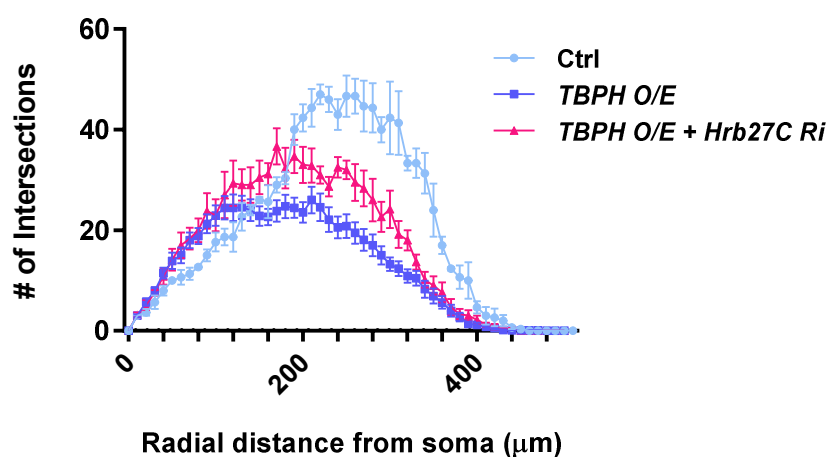

Figure 6-figure supplement 2
