# Supplementary figures and images for: Cytosolic calcium regulates cytoplasmic accumulation of TDP-43 through Calpain-A and Importin α3
Source: eLife journal article supplement (doi:10.7554/elife.60132), 2020-12-11

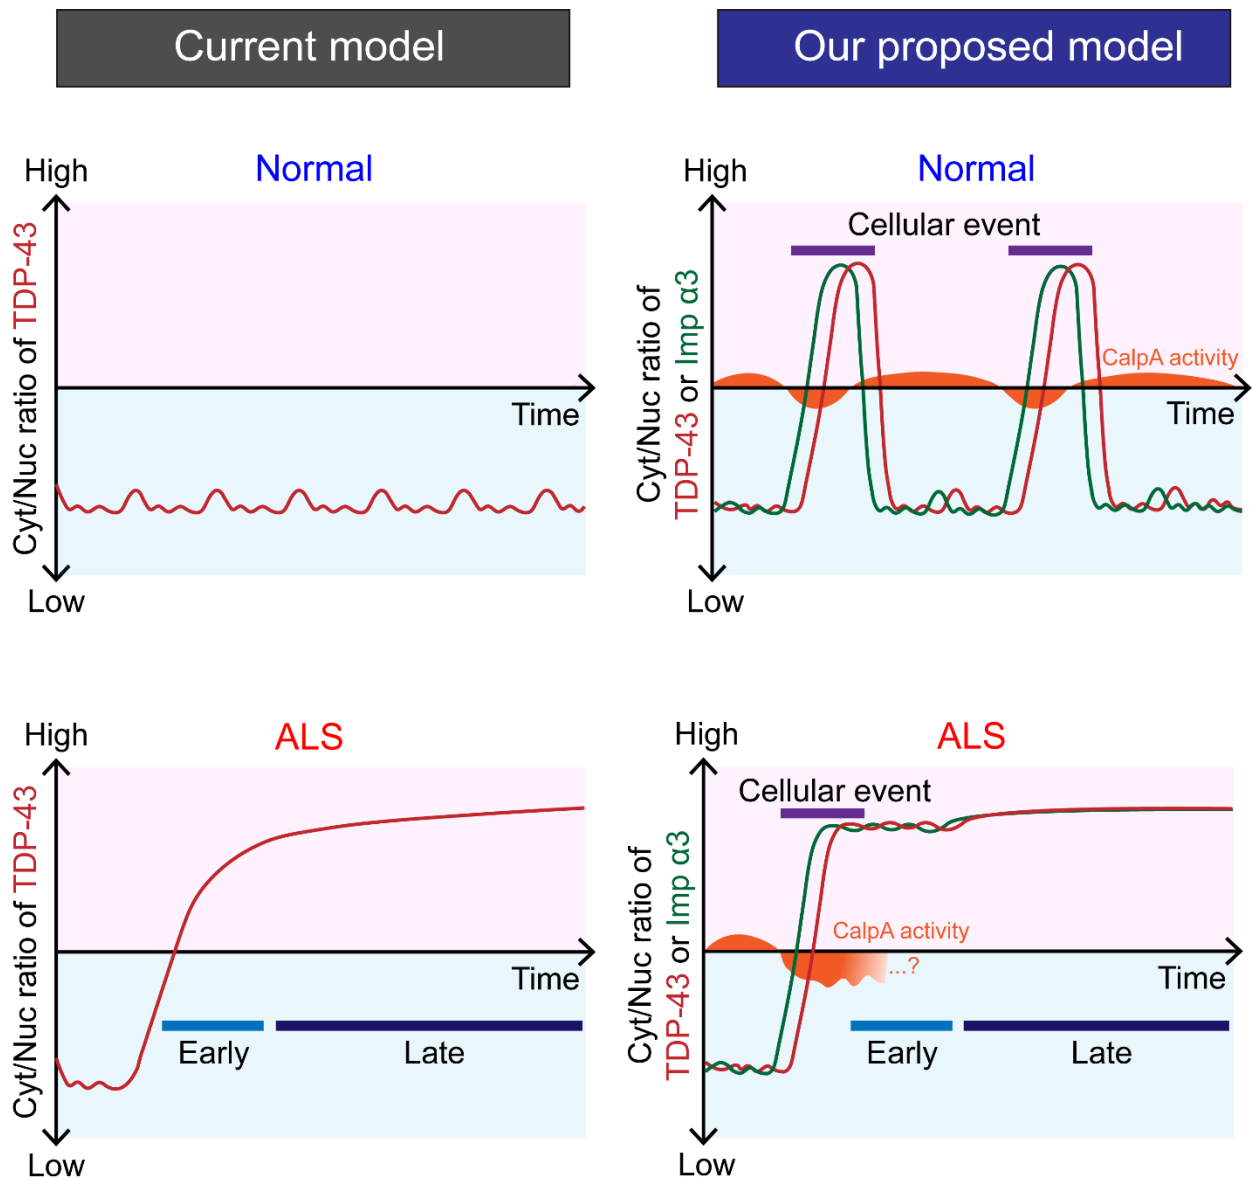

Figure 7-figure supplement 2

Supplement: supp [file elife-60132-supp-v1.zip]

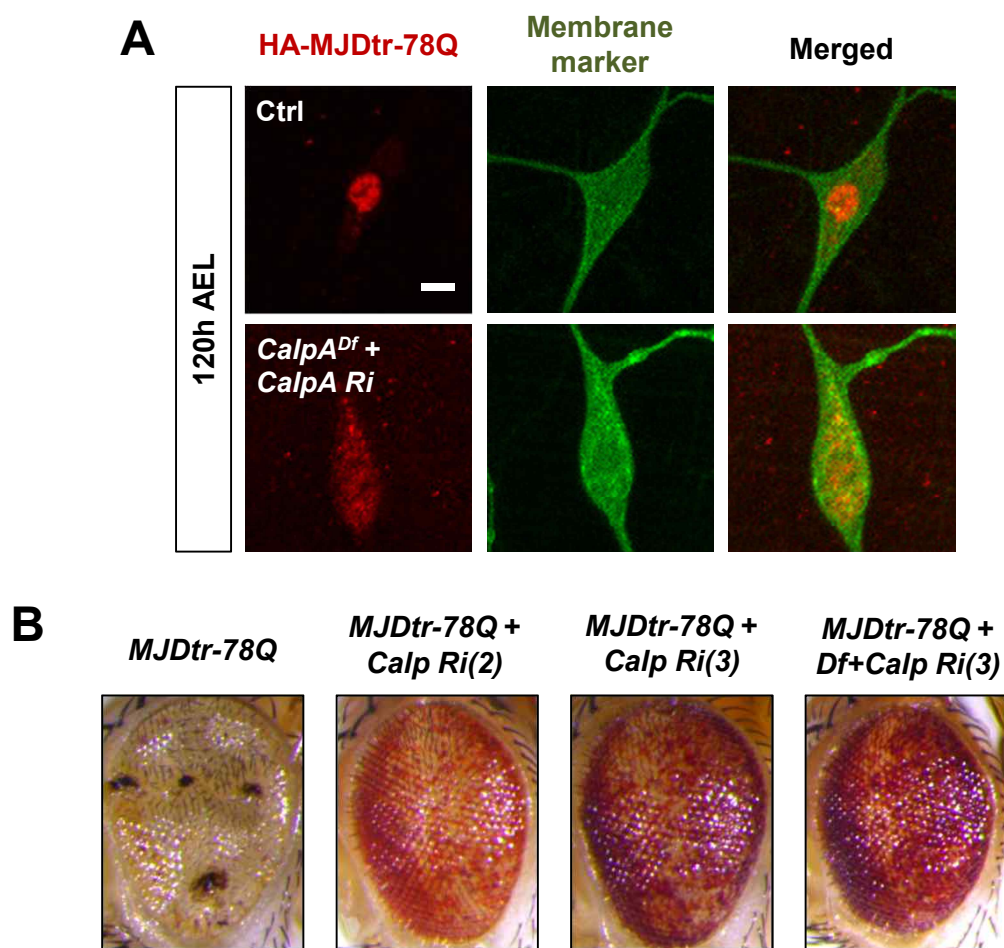

Figure 7-figure supplement 3

Supplement: supp [file elife-60132-supp-v1.zip]

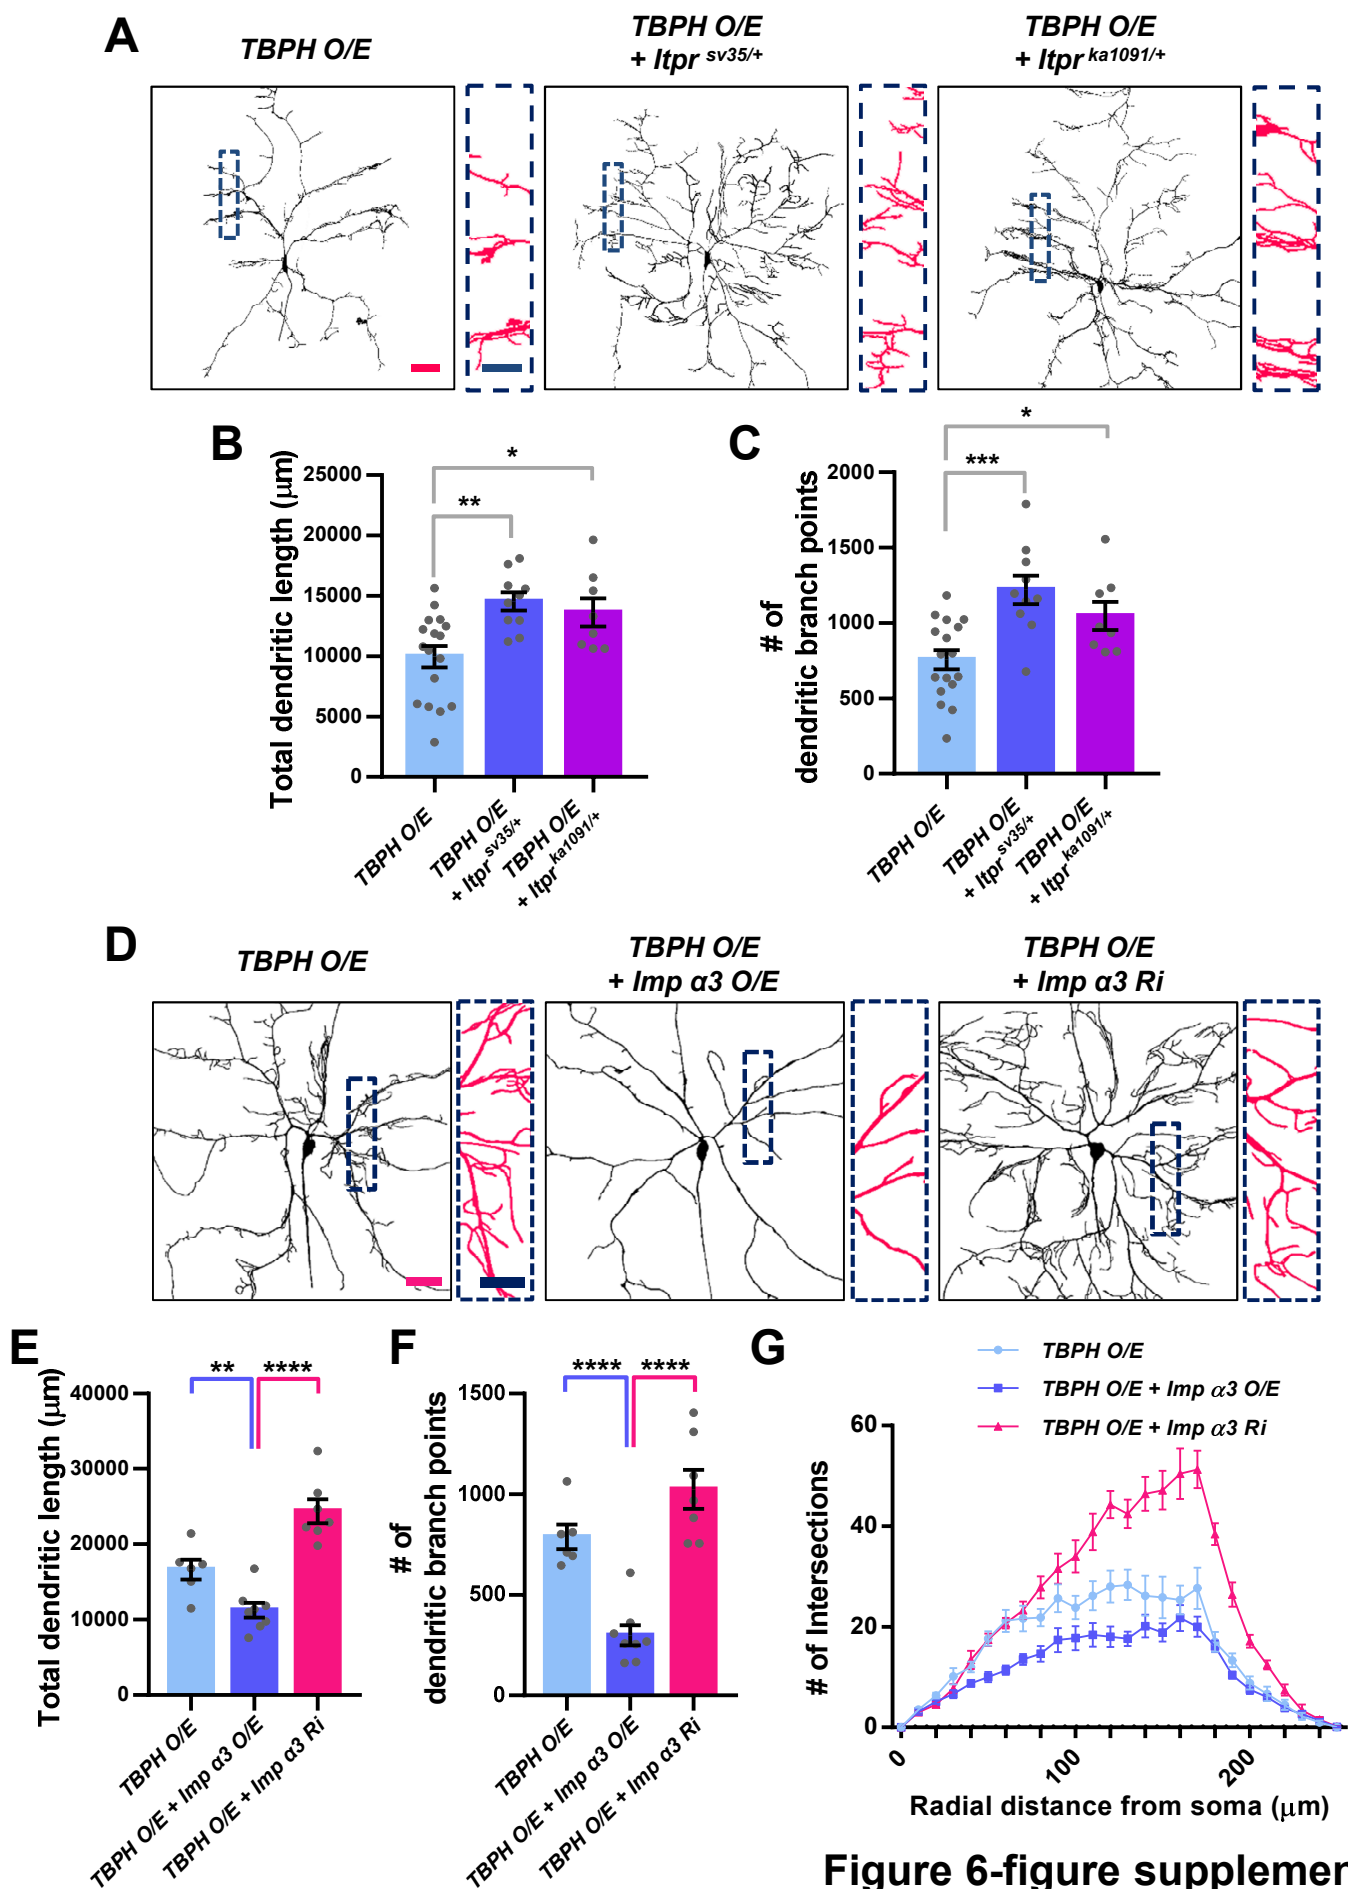

Figure 6-figure supplement 1

Supplement: supp [file elife-60132-supp-v1.zip]

**A**

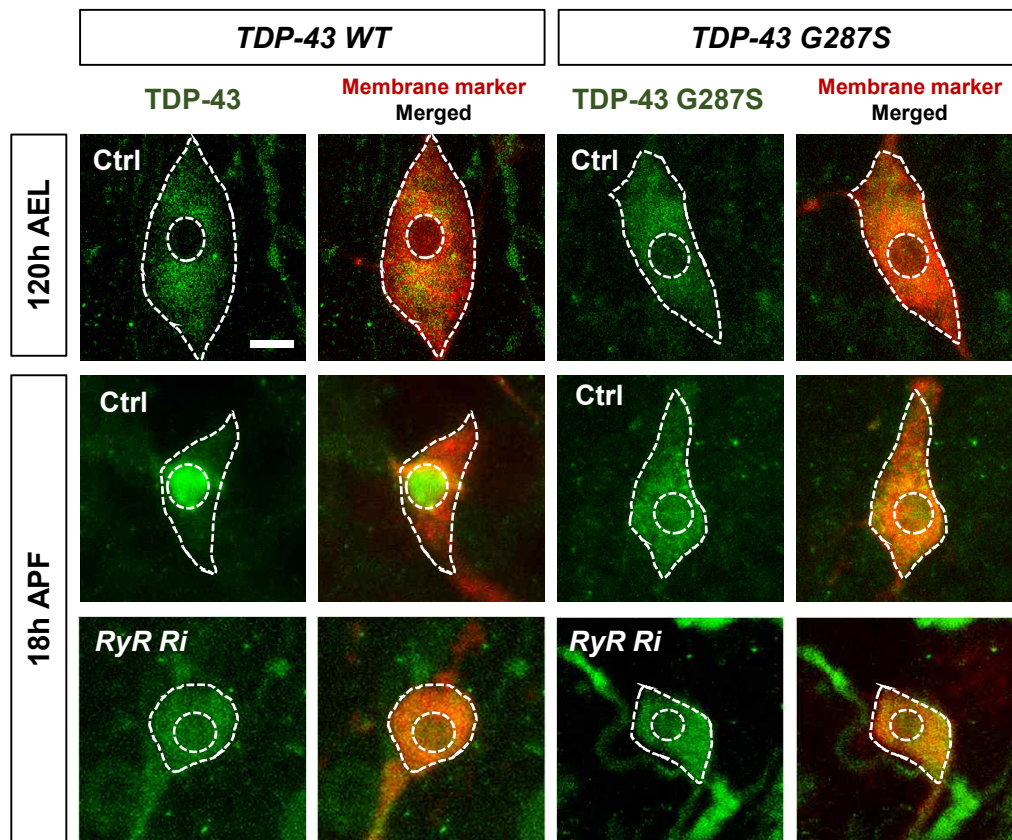

**B**

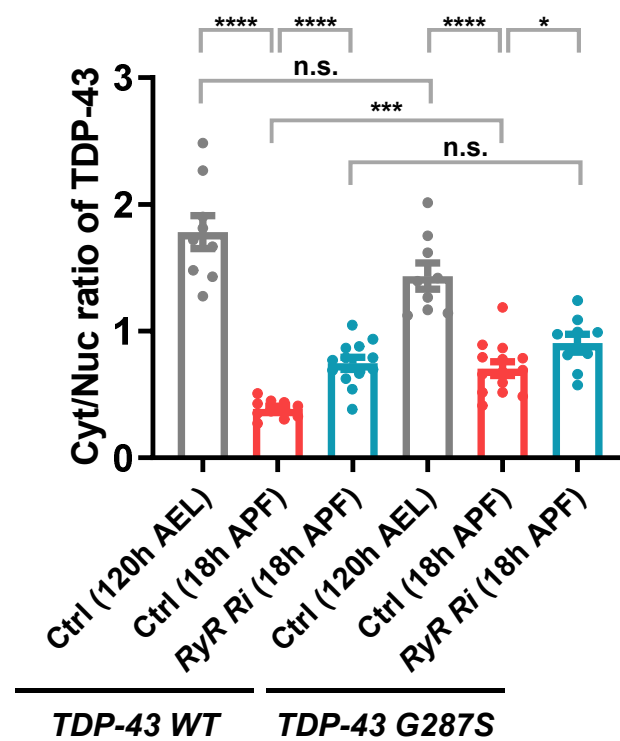

Figure 2-figure supplement 2

Supplement: supp [file elife-60132-supp-v1.zip]

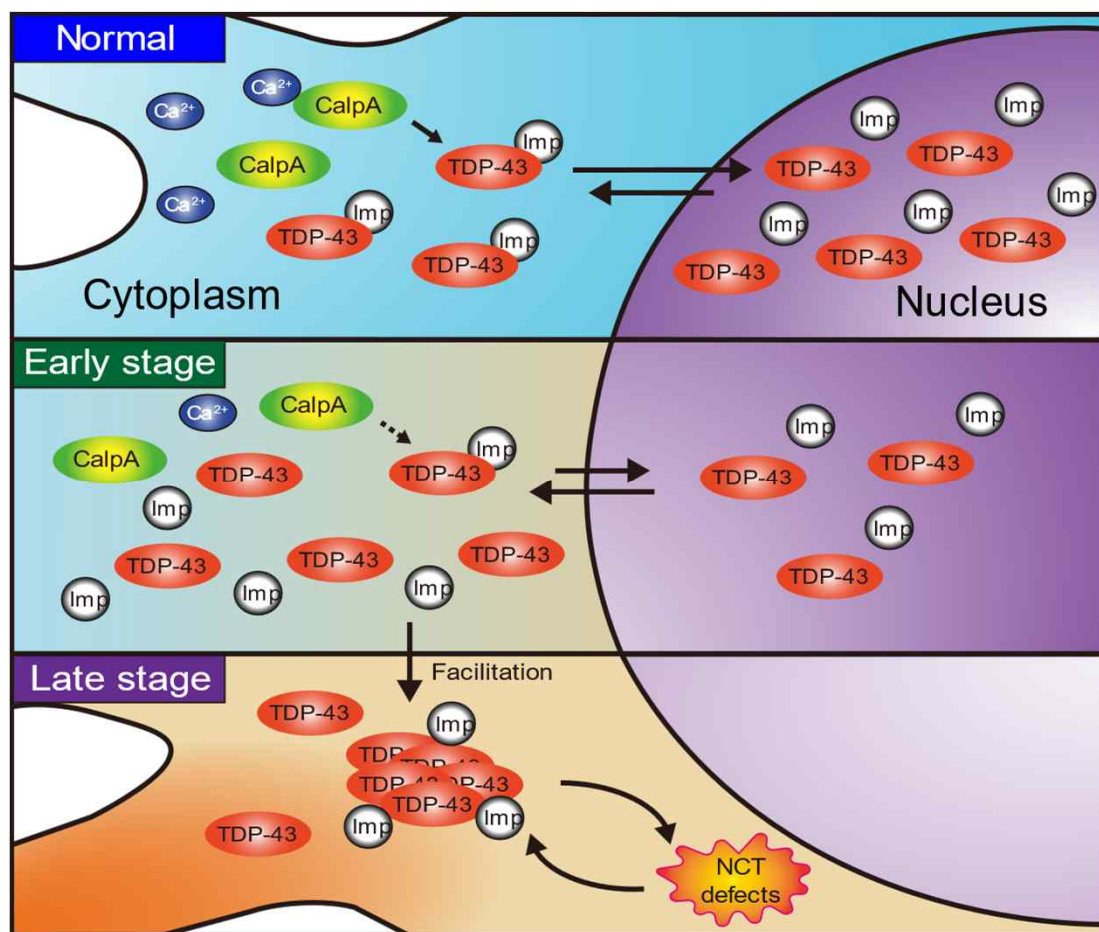

Figure 7-figure supplement 1

Supplement: supp [file elife-60132-supp-v1.zip]

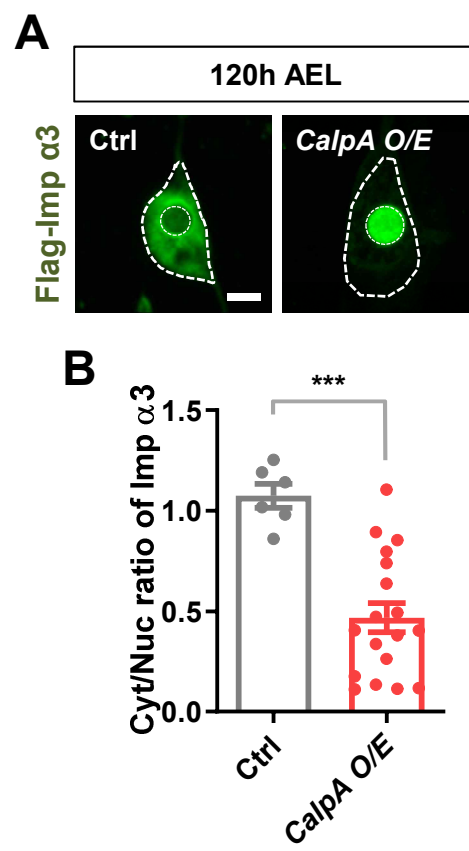

Figure 5-figure supplement 1

Supplement: supp [file elife-60132-supp-v1.zip]

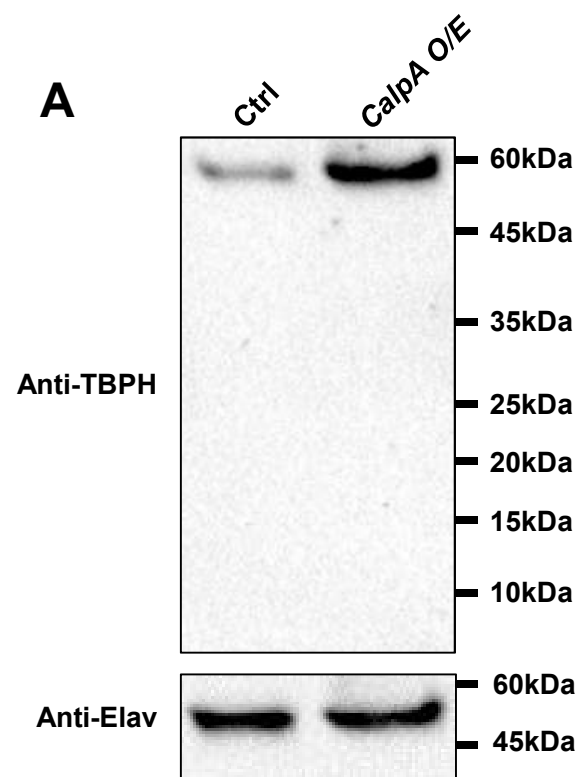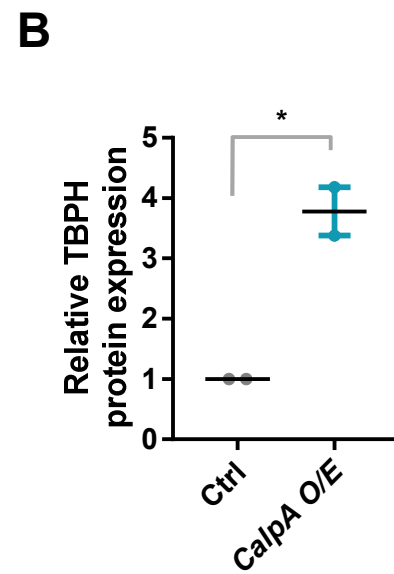

Figure 7-figure supplement 4

Supplement: supp [file elife-60132-supp-v1.zip]

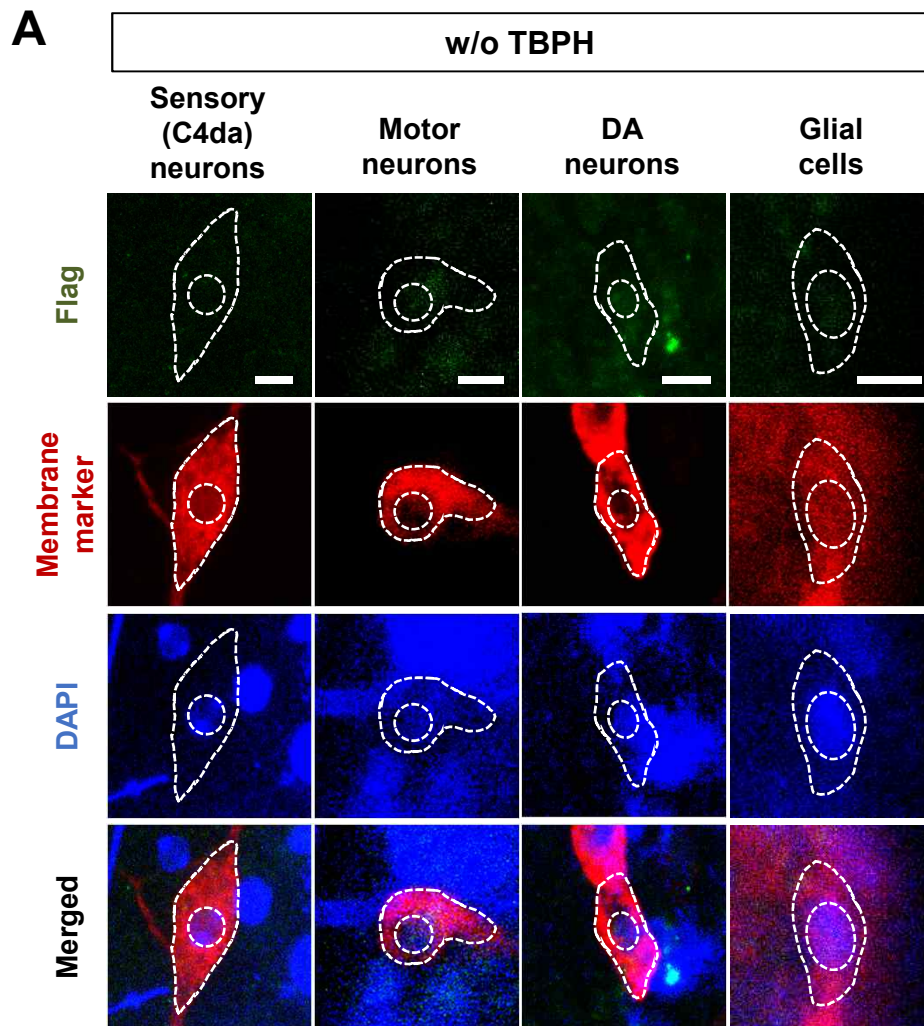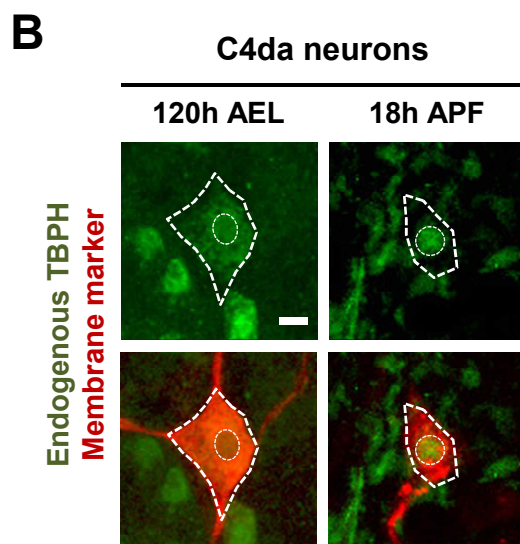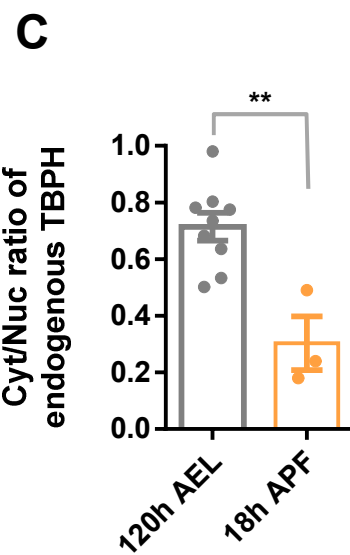

Figure 1-figure supplement 1

Supplement: supp [file elife-60132-supp-v1.zip]

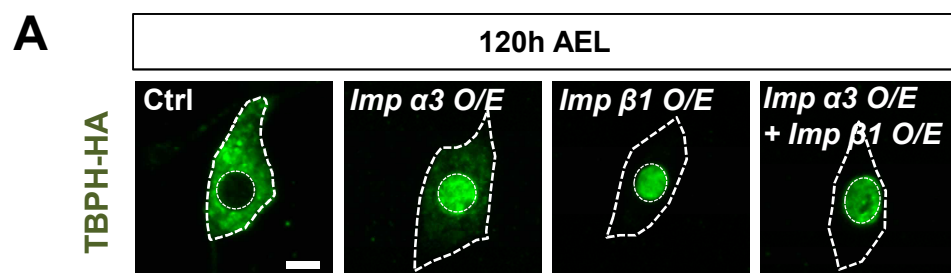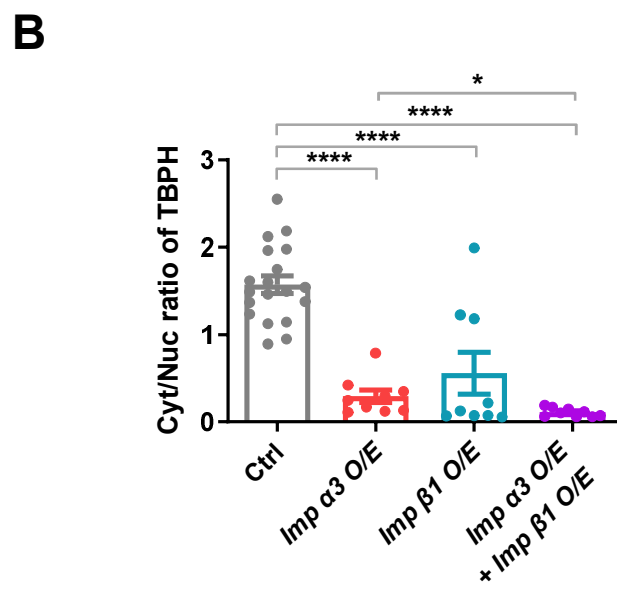

Figure 4-figure supplement 2

Supplement: supp [file elife-60132-supp-v1.zip]

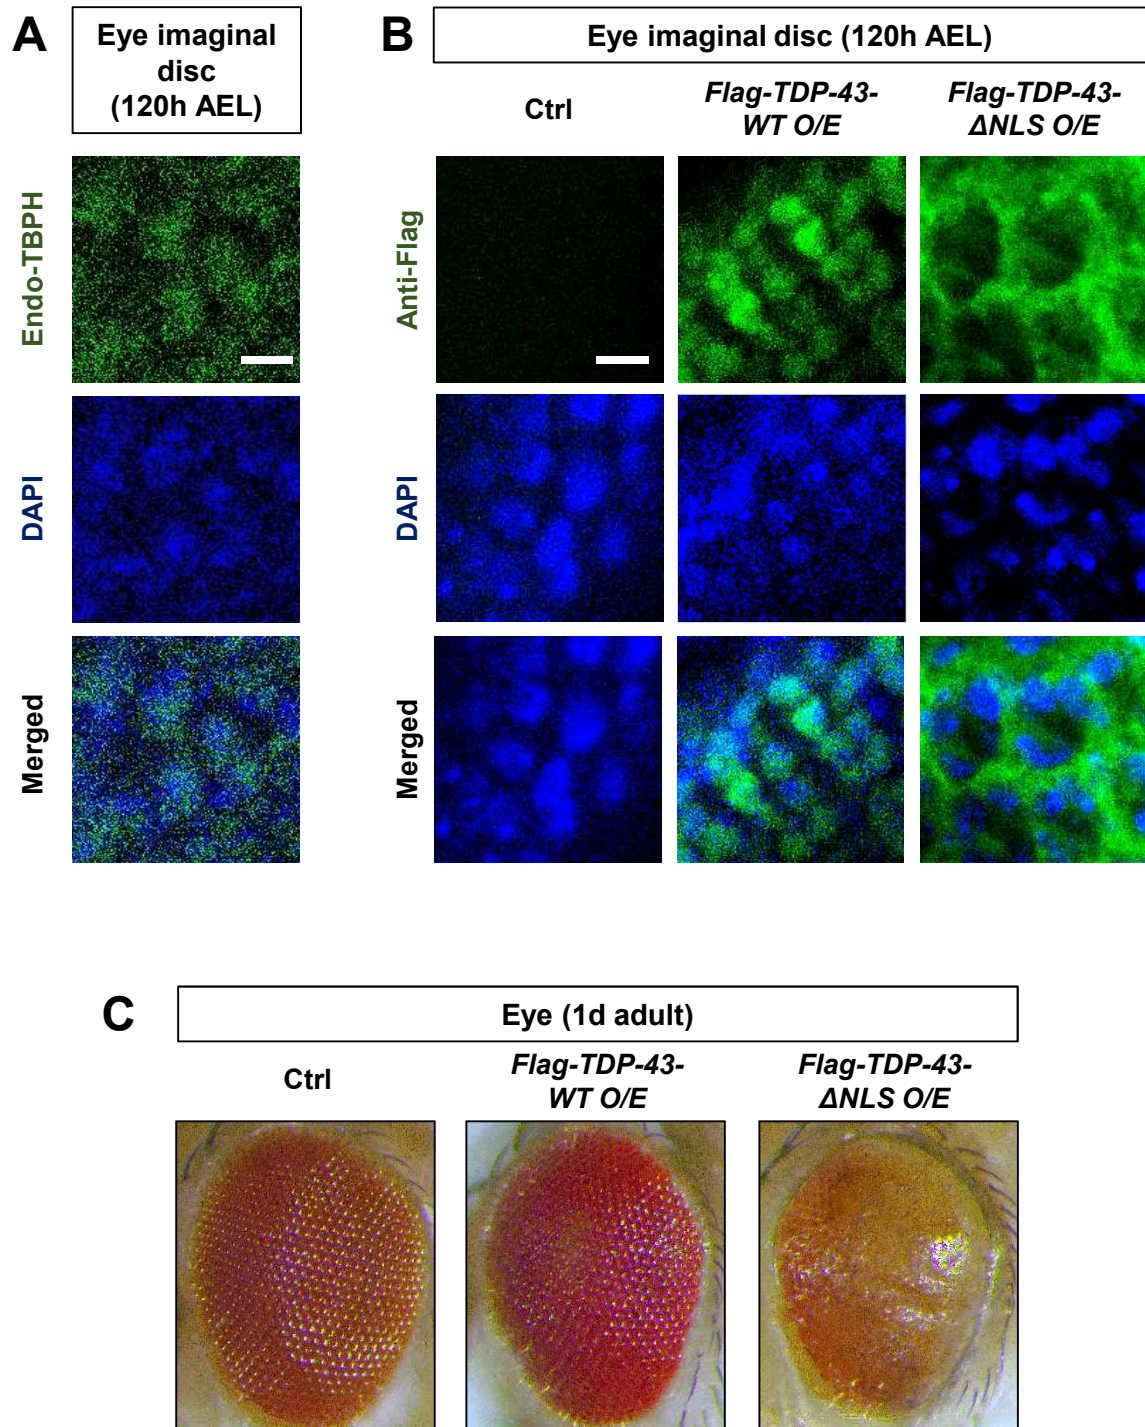

Figure 6-figure supplement 3

Supplement: supp [file elife-60132-supp-v1.zip]

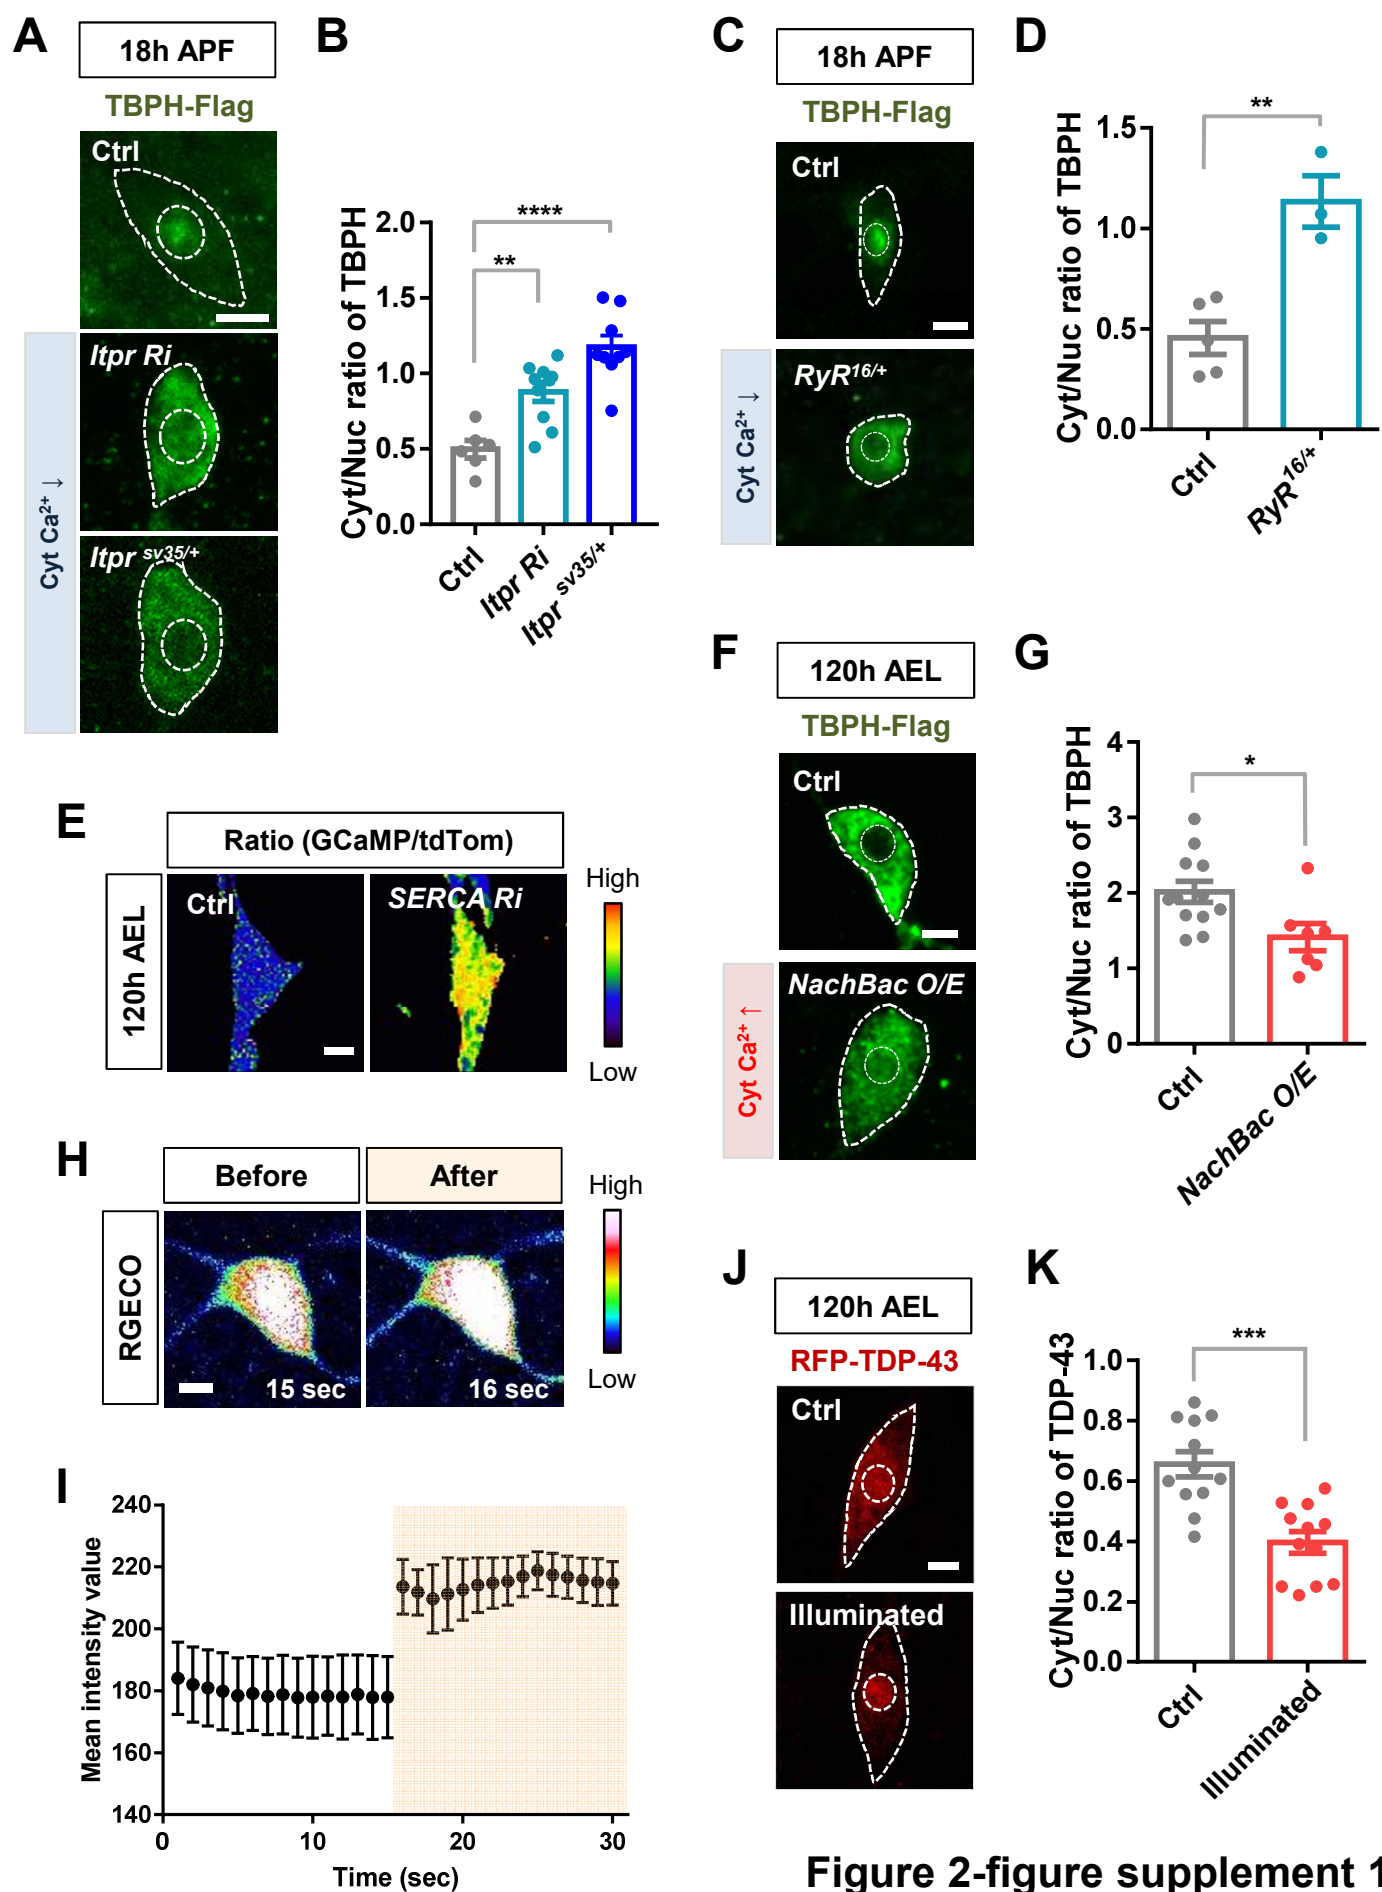

Figure 2-figure supplement 1

Supplement: supp [file elife-60132-supp-v1.zip]
